1 **Title: Comparison of tuning properties of gamma and high-gamma power in local field**  
2 **potential (LFP) versus electrocorticogram (ECoG) in visual cortex**

3

4 **Running title: Comparison of gamma and hi-gamma tuning in LFP versus ECoG**

5

6 **Authors**

7 Agrita Dubey<sup>1,2</sup> and Supratim Ray<sup>1\*</sup>

8

9 **Affiliations**

10 <sup>1</sup>Centre for Neuroscience, Indian Institute of Science, Bangalore, India, 560012

11 Telephone +91 80 2293 3437, Facsimile +91 80 2360 3323

12 <sup>2</sup>Center for Neural Science, New York University, New York, USA, 10003

13

14 **Corresponding author:**

15 \*Supratim Ray: [sray@iisc.ac.in](mailto:sray@iisc.ac.in)

16

17 **Number of Pages:** 35

18 **Number of Figures:** 7 (all color)

19 **Keywords** ECoG, LFP, Gamma oscillations, High-gamma activity

## 20 **Abstract**

21 Electrocorticogram (ECoG), obtained from macroelectrodes placed on the cortex, is typically  
22 used in drug-resistant epilepsy patients, and is increasingly being used to study cognition in  
23 humans. These studies often use power in gamma (30-70 Hz) or high-gamma (>80 Hz) ranges  
24 to make inferences about neural processing. However, while the stimulus tuning properties of  
25 gamma/high-gamma power have been well characterized in local field potential (LFP; obtained  
26 from microelectrodes), analogous characterization has not been done for ECoG. Using a hybrid  
27 array containing both micro and ECoG electrodes implanted in the primary visual cortex of  
28 two female macaques, we compared the stimulus tuning preferences of gamma/high-gamma  
29 power in LFP versus ECoG and found them to be surprisingly similar. High-gamma power,  
30 thought to index the average firing rate around the electrode, was highest for the smallest  
31 stimulus (0.3° radius), and decreased with increasing size in both LFP and ECoG, suggesting  
32 local origins of both signals. Further, gamma oscillations were similarly tuned in LFP and  
33 ECoG to stimulus orientation, contrast and spatial frequency. This tuning was significantly  
34 weaker in electroencephalogram (EEG), suggesting that ECoG is more like LFP than EEG.  
35 Overall, our results validate the use of ECoG in clinical and basic cognitive research.

## 36 **Introduction**

37 Electrocorticography (ECoG), also known as intracranial electroencephalography (iEEG), is  
38 obtained from macroelectrodes placed subdurally on the pial surface of cortex and is widely  
39 used in drug-resistant epilepsy patients. The patients are often monitored for weeks for  
40 localization of the seizure focus, allowing (with patient's consent) researchers to conduct  
41 cognitive and neuroscience studies<sup>1-9</sup>.

42

43 These studies often use power in gamma (30-70 Hz) and high-gamma (>80 Hz) ranges to make  
44 inferences about the underlying neural processing<sup>10</sup>. High-gamma activity (>80 Hz) refers to  
45 power over a broad range of frequencies above the gamma band that, in ECoG, is modulated  
46 by stimulus presentation as well as the behavioral state<sup>4,5,10-13</sup>. High-gamma activity is also  
47 observed in local field potential (LFP) obtained by inserting microelectrodes in the cortex of  
48 animals, where it is tightly correlated with the spiking activity of neurons in the vicinity of the  
49 microelectrode<sup>13-17</sup>.

50

51 Gamma rhythm (30-70 Hz), which is different from high-gamma activity<sup>17</sup>, has been  
52 extensively studied in electroencephalogram (EEG) in humans and LFP in animals, and has  
53 been associated with high level cognitive functions such as attention, memory and  
54 perception<sup>18-24</sup>. Further, gamma is known to be strongly induced by stimuli such as  
55 bars/gratings and depends on stimulus properties such as size, orientation, spatial frequency,  
56 contrast and temporal frequency<sup>16,17,25-29</sup>. Stimulus dependence of gamma has also been  
57 characterized in EEG/MEG studies<sup>30-35</sup>. However, only a few studies have characterized the  
58 stimulus preference of gamma in ECoG<sup>30,36</sup>. No study, to our knowledge, has done a direct  
59 comparison of stimulus preferences of gamma/high-gamma in LFP versus ECoG.

60

61 Apart from providing clues about the neural correlates of gamma/high-gamma activity in  
62 ECoG, such a comparison allows us to determine the spatial spread (the cortical area around  
63 the electrode that contributes to the signal that is recorded from that electrode) of ECoG, which  
64 we have recently shown to be very local<sup>37</sup>. For example, both the firing rates and LFP high-  
65 gamma power reduce with increasing stimulus size because of larger surround suppression<sup>17</sup>.  
66 However, since a larger stimulus activates a larger cortical area, we might observe an increase  
67 in ECoG high-gamma (despite a reduction in firing rate) if ECoG spatial spread is much larger  
68 than LFP. Similarly, we have recently shown that gamma power recorded using EEG has much  
69 weaker tuning preferences (for stimulus orientation, size and contrast) compared to LFP<sup>29</sup>. A  
70 comparison of analogous gamma tuning preferences for ECoG versus LFP will provide clues  
71 about their similarity. Recording from a unique hybrid grid which consists of both micro and  
72 macro-electrodes, implanted in the primary visual cortex of the same two female macaques for  
73 which we had earlier compared LFP versus EEG tuning<sup>29</sup> and LFP versus ECoG spatial  
74 spreads<sup>37</sup>, we compared the strength of ECoG and LFP gamma/high-gamma power for  
75 different stimulus properties such as size, orientation, spatial frequency and contrast.

## 76 **Results**

77 We simultaneously recorded LFP and ECoG signals using a special custom-made hybrid grid  
78 electrode array implanted in the left primary visual cortex (V1) of two monkeys (Monkeys 3  
79 and 4), trained to perform a fixation task, while visual gratings that varied in size, orientation,  
80 contrast or spatial frequency were presented on a screen. This hybrid grid consisted of 9 (3x3)  
81 ECoG electrodes and 81 (9x9) microelectrodes, both attached to the same connector and  
82 referenced to same wire. The microelectrode array was placed between four ECoG electrodes  
83 in V1 (see Figure 1 of Ref 37). For the variable stimulus size condition (Figures 1-4), data  
84 from two additional monkeys (Monkeys 1 and 2) was used, for which microelectrode and  
85 ECoG recordings were conducted separately (see Methods for details). All spectral analyses  
86 were performed using the multi-taper method<sup>38,39</sup>.

87

### 88 **High-gamma activity in ECoG is maximum for a small stimulus size (radius of 0.3°)**

89 Figure 1A shows the raster plot and multiunit firing rate of an example recording site from  
90 Monkey 3 when gratings of six different radii (0.3°, 0.6°, 1.2°, 2.4°, 4.8° and 9.6°) were  
91 presented between 0 and 800 ms. The peristimulus histogram averaged across trials is overlaid  
92 on each of the raster plots. Consistent with our previous results<sup>17</sup>, increasing the stimulus size  
93 decreased the firing rate. Similar trends were observed for the population dataset of 15, 107,  
94 24 and 22 recordings sites from the four monkeys (Figure 1B). Note that the stimulus radii for  
95 Monkeys 1 and 2 were different from Monkeys 3 and 4.

96

97 Next, we studied the LFP and ECoG signals for varying stimulus sizes. Figure 2A shows the  
98 change in LFP power relative to the baseline period (defined as 500 to 0 ms before stimulus  
99 onset) for the same example site as Figure 1A from Monkey 3 for six different sizes. These  
100 time-frequency energy difference spectra showed a prominent gamma rhythm (red horizontal

101 band) at ~50 Hz for stimulus size of 0.6° and above, which appeared after the initial transient  
102 and remained present throughout the stimulus duration (up to 0.8 s). Consistent with previous  
103 studies<sup>16,17,26,29</sup>, strength of LFP gamma rhythm increased with an increase in stimulus size  
104 while the gamma peak frequency decreased. Further, the smallest stimulus (radius 0.3°)  
105 showed a prominent increase in power over a broad frequency range above the gamma band.  
106 The power in this broadband showed the opposite trend and decreased with an increase in  
107 stimulus size. Figure 2B shows the time-frequency difference spectra for an example ECoG  
108 electrode from the same monkey. Similar to LFP, the power of ECoG gamma increased with  
109 increasing stimulus size. Surprisingly, even though the ECoG electrode was much larger than  
110 LFP, the smallest stimulus produced the largest high-gamma power even in ECoG. The  
111 increase in ECoG high-gamma power was more prominent up to ~250 Hz, unlike LFP high-  
112 gamma that remained prominent up to 400 Hz and beyond. Similar results were obtained from  
113 the population average of 24 LFP sites and 5 ECoG sites (Figure 2C and 2D).

114  
115 Figure 3 A, C, E and G show mean change in power from the baseline (obtained by subtracting  
116 log of baseline power from the log of stimulus power, see Methods for details) across recording  
117 sites, as a function of frequency for Monkeys 1, 2, 3 and 4. In all monkeys, the largest stimulus  
118 produced the strongest but slowest gamma, visible as a prominent peak at ~45-60 Hz (orange  
119 traces). In all monkeys except Monkey 4, a prominent harmonic of gamma was also visible  
120 between 80-120 Hz. However, there were interesting differences between Monkeys 1, 2 and  
121 Monkeys 3, 4, because much larger stimulus sizes were used for the latter two monkeys. For  
122 example, in Monkey 4, a second gamma peak was clearly visible at ~30 Hz for the largest  
123 stimulus size, which is the 'slow' gamma as described in our previous study<sup>29</sup>. Also, the LFP  
124 gamma in Monkey 4 was weaker than Monkey 3 (this was also observed in our previous  
125 study<sup>29</sup>, in which recordings were done from a different hemisphere using a different array);

126 we discuss this in more detail in the Discussion. Importantly, in spite of the differences in the  
127 strength of gamma and high-gamma band across monkeys, the overall trends remained similar:  
128 the strength of gamma rhythm increased with an increase in stimulus size whereas high-gamma  
129 power decreased. Importantly, similar trends were also observed in the ECoG signals. To  
130 compare the changes in power with stimulus size for LFP and ECoG, we computed the power  
131 in two frequency bands: 30-65 Hz for gamma and 150-250 Hz for high-gamma, as shown in  
132 Figure 3 B, D, F and H. The gamma range was chosen to avoid the ‘slow’ gamma, while the  
133 high-gamma range was chosen to avoid the harmonic of gamma between 80-120 Hz. As  
134 observed in PSD plots, the power in gamma band increased with size for both LFP and ECoG  
135 (the only exception was the ECoG of Monkey 2 for which only a single electrode was  
136 available), whereas high-gamma power showed opposite trends. Interestingly, high-gamma  
137 power was maximum for the smallest stimulus (radius of  $0.3^\circ$ ) for both LFP and ECoG for all  
138 the four monkeys. This suggests local origins of ECoG in primary visual cortex, similar to our  
139 previous study<sup>37</sup>, since high-gamma would have been expected to be higher for a larger  
140 stimulus if spatial summation occurred over a large cortical area for ECoG. However, unlike  
141 our previous approaches<sup>37</sup>, this approach did not provide a quantitative estimate of the spatial  
142 spread. We discuss this in more detail in the Discussion.

143

144 A comparison of the shape of the change in power spectra for LFP (Figure 3A, C, E, G, top  
145 row) versus ECoG (bottom row) revealed an interesting difference. Beyond  $\sim 100$  Hz, the traces  
146 were almost parallel to the x-axis in the case of LFP (in all except Monkey 4) but showed a  
147 negative slope for ECoG in all monkeys. This suggested that the slope of the PSD in the high-  
148 gamma range during stimulus and baseline periods were comparable in case of LFP (such that  
149 the difference produced a zero-slope line), but stimulus PSD had a steeper slope than baseline  
150 in case of ECoG. Indeed, we have previously observed that while increase in high-gamma

151 power could be observed up to at least ~400 Hz in LFP<sup>40</sup>, it was prominent only up to ~150 Hz  
152 in human ECoG<sup>13</sup>. We further quantified this by plotting the slopes of high-gamma range  
153 during stimulus period versus baseline (Figure 4). The LFP slopes for stimulus and baseline  
154 period were comparable (mean slope during stimulus: 1.31, baseline: 1.22,  $p=0.15$ , paired t-  
155 test (two sample t-test)), whereas the ECoG slopes for stimulus period were greater than  
156 baseline period (mean slope during stimulus: 2.92, baseline: 1.87,  $p=0.00035$ ).

157

### 158 **Stimulus tuning of gamma oscillations**

159 We first compared the orientation tuning (both preferred angle and selectivity; equations 3 and  
160 4) between LFP and ECoG, for two reasons. First, while it is well established that different  
161 neurons prefer different orientations in V1 such that the distribution of orientation preferences  
162 of MUA is more or less uniform<sup>41-43</sup>, several studies have shown that the stimulus orientation  
163 that generates the strongest gamma in microelectrode recordings is remarkably similar across  
164 all the recording sites<sup>16,29,44</sup>. However, since these microelectrode arrays span only ~4x4 mm<sup>2</sup>  
165 patch of cortex, it is possible that different patches of cortex prefer different orientations (the  
166 preferred orientation for gamma is location specific, but not monkey specific). Because ECoGs  
167 record from brain areas separated by 10 mm or more, comparison of orientation preferences  
168 across ECoG sites could provide clues about the specificity of orientation tuning in the gamma  
169 band. Second, we have recently shown that the orientation selectivity (measure of the strength  
170 of orientation tuning) for gamma was much weaker in EEG compared to LFP<sup>29</sup>. This could be  
171 because EEG records activity from a much larger part of the brain than LFP, and these parts  
172 may not be as well tuned for a particular orientation. A comparison of the orientation selectivity  
173 of ECoG and LFP could therefore provide clues about their similarity.

174



175 Figure 5A shows the population average of the change in LFP and ECoG power as a function  
176 of frequency, across 77 LFP (top) and 5 ECoG (bottom) recording sites for Monkey 3. The  
177 change in power was computed between 250 ms to 750 ms relative to baseline period (0 ms to  
178 500 ms before stimulus onset) and then averaged across sites on a log scale. The eight colored  
179 traces represent the change in power spectrum for eight stimulus orientations. We observed  
180 that the mean LFP gamma between 45 to 70 Hz was strongest and fastest at a stimulus  
181 orientation of 90°. Surprisingly, mean ECoG gamma showed similar trends as LFP gamma  
182 with the strongest and fastest gamma for 90° orientation (Figure 5B, top panel).

183

184 To examine the preferred orientation of gamma at different cortical locations we computed the  
185 preferred orientation of gamma in 45 to 70 Hz frequency range for each of the recording sites.  
186 Figure 5C shows ECoG (diamonds) and LFP (circles) electrodes, plotted at their receptive field  
187 centers and color-coded based on preferred orientation for Monkey 3. Consistent to previous  
188 studies<sup>16,29,44</sup>, we observed that preferred orientation of LFP gamma was similar across sites  
189 (Figure 5B, bottom panel, magenta bars). Interestingly, all the five ECoG electrodes which  
190 covered ~20 x 20 mm in the cortex, showed a remarkably similar preference for stimulus  
191 orientation. Although we observed small variations in preferred orientation from the electrode  
192 to electrode, the distribution of ECoG (ranging from 70° to 100°) was similar to the LFP  
193 (ranging from 80° to 100°; Figure 5B, bottom panel). Further, the strength of orientation tuning  
194 measured by orientation selectivity was on average comparable for ECoG and LFP (Figure  
195 5D). The ECoG electrodes which showed a deviation from 90° had low orientation selectivity  
196 values, represented by the smaller marker size in Figure 5C. Similar results were observed for  
197 Monkey 4 across 18 LFP and 4 ECoG recording sites (Figure 5E - 5H). Thus, the orientation  
198 preference of gamma is monkey specific but not location specific.

199

200 The orientation preference and selectivity depended on the choice of the frequency band. In  
201 particular, for Monkey 3, gamma peak frequency was below our lower cutoff of 45 Hz for  
202 some orientations. We used this gamma range to be in congruence with our previous study<sup>29</sup>,  
203 in which we had recorded from the same monkeys but used a microelectrode array implanted  
204 in the other hemisphere, and had also collected simultaneous EEG data. Since the orientation  
205 preferences for LFPs were similar for the two arrays, having the same frequency range allowed  
206 us to better compare the LFP, ECoG and EEG gamma tuning. Further, the low frequency cutoff  
207 could not be lowered due to the presence of ‘slow gamma’ (see Ref 29), which peaked between  
208 30-35 Hz for the two monkeys. As discussed in more detail later, tuning properties critically  
209 depend on the choice of the lower frequency cutoff. Nonetheless, visual inspection of Figures  
210 5A and 5E reveals that the gamma peaks were remarkably similar for LFP and ECoG for both  
211 monkeys, such that choosing a different frequency range changed the tuning parameters in  
212 similar ways.

213

214 Like orientation, gamma tuning of LFP and ECoG were similar for spatial frequency (Figure  
215 6) and contrast (Figure 7). In particular, ECoG gamma peak frequency increased with contrast  
216 and was similar to LFP peak frequency in both monkeys (for contrasts above 25% that  
217 generated salient gamma peaks; Figure 7B, D), unlike EEG gamma peak frequency that did  
218 not show a substantial increase with contrast<sup>29</sup>. Overall, our results suggest that ECoG is more  
219 similar to LFP than EEG.

## 220 **Discussion**

221 We compared the stimulus tuning properties of gamma/high-gamma in LFP and ECoG by  
222 simultaneously recording these signals using a custom-made hybrid grid and found them to be  
223 surprisingly similar. The smallest stimulus size tested (radius of  $0.3^\circ$ ), which has been earlier  
224 shown to produce largest high-gamma power in LFP<sup>17</sup>, produced the largest high-gamma  
225 power in ECoG as well. Further, tuning preferences of gamma oscillations for stimulus size,  
226 orientation, spatial frequency and contrast were very similar for LFP and ECoG. Overall, these  
227 results suggest that ECoG is an excellent signal to study gamma oscillations.

228

229 These results are consistent with our recent study<sup>37</sup>, in which we used a receptive field (RF)  
230 mapping approach to show that the spatial spread of ECoG was surprisingly local (SD of  $\sim 1.5$   
231 mm or 2SD of  $\sim 3$ mm), not much larger than the diameter of the ECoG electrode (2.3 mm), and  
232 only  $\sim 3$  times the spread of LFP (2SD of  $\sim 1$ mm). These results are also consistent with the  
233 observation that the RFs of ECoGs recorded in humans are very small<sup>3</sup>, although in that study  
234 the RFs (measured in degrees) were not converted to cortical spreads (measured in mm).

235

236 Unfortunately, this approach did not yield a quantitative estimate of the ECoG spread, for two  
237 reasons. First, it is possible that ECoG preferentially samples neurons in the upper layers of the  
238 cortex that may prefer smaller stimulus sizes, so it is difficult to deduce spatial spread from  
239 size tuning. Second, the range of stimulus sizes that we used was not wide enough to  
240 quantitatively compare the spreads of LFP and ECoG. Use of even smaller stimuli (for  
241 example, radius of  $0.1^\circ$ ) would have yielded a better estimate of the ‘optimal’ stimulus size for  
242 LFP high-gamma power, and comparison of optimal stimulus sizes for LFP and ECoG would  
243 have yielded a quantitative estimate of their respective spatial spreads. However, when  
244 extremely small stimuli are used, appropriate comparison is possible only in the absence of eye

245 jitters. Given that the monkey had to maintain fixation only within 1° or more around the  
246 fixation spot, it is possible that a very small stimulus would occasionally miss the receptive  
247 field completely if the monkey's gaze was away from the fixation spot, increasing the  
248 variability of the estimate of high-gamma power for very small stimuli. The method used in  
249 our previous study<sup>37</sup>, which is originally based on the model proposed by Xing and  
250 colleagues<sup>45</sup>, partially addressed this concern because the inflation in the estimate of the RF  
251 size due to several factors (including eye jitters) is similar for different measures (MUA, LFP  
252 and ECoG), and therefore a model that estimates the spatial spreads based on the differences  
253 in RF sizes between measures (such as MUA versus LFP and LFP versus ECoG) can cancel  
254 out these common terms (see Refs <sup>37,45</sup> for details). We had also used another approach that  
255 involved the comparison of the PSDs of ECoG and LFP during spontaneous periods to show  
256 that the ECoG spread was local. The present approach, obtained by simply comparing the high-  
257 gamma power as a function of stimulus size, provides a third, albeit weaker line of evidence  
258 that ECoG is a local signal. Further, this result is obtained without any model or additional  
259 assumptions and is complementary to the previous two approaches that used either very small  
260 stimuli to map RFs or compared the PSDs during spontaneous periods.

261

262 What are the origins of high-gamma activity in ECoG? High-gamma activity was initially  
263 interpreted in the same conceptual framework as gamma oscillations, just operating at a higher  
264 frequency<sup>46-48</sup>. More recently, high-gamma in the LFP has been shown to be tightly correlated  
265 with the multiunit firing rate<sup>13-17</sup>. ECoG high-gamma power has been proposed to reflect the  
266 synchrony in neural population<sup>13</sup>, although direct experimental evidence, to our knowledge, is  
267 lacking. In the size study, we observed that upper range of ECoG high-gamma was limited to  
268 200-250 Hz compared to at least 400 Hz in LFP (see Figure 2B vs 2A for stimulus radius of  
269 0.3°). This was consistent across electrodes (Figure 2D vs 2C) and monkeys (Figure 3A, C, E

270 and G; bottom vs top panel), and was further quantified by comparing the slopes in stimulus  
271 period with baseline period (Figure 4). This could be because the PSD of the ECoG was much  
272 steeper than LFP at low frequencies (see Ref<sup>37</sup>), and therefore the overall power of the ECoG  
273 at high frequencies was much lower than LFP. Thus, the noise (either in the device or the brain)  
274 could have affected the ECoG signal more than LFP at high frequencies. It appears that even  
275 the LFP for Monkey 4 was more affected by noise, since the PSD slopes in this monkey were  
276 shallower during both baseline and stimulus periods compared to other monkeys (Figure 4).  
277 The differences in PSD slopes for ECoG compared to LFP could be due to its larger size, lower  
278 impedance or position.

279

280 We observed that the tuning preferences of gamma were similar for ECoG and LFP for all the  
281 four stimulus manipulations (size, orientation, spatial frequency and contrast), while previously  
282 we had observed considerable differences between LFP and EEG tuning<sup>29</sup>. Note that while  
283 these recordings were done on the same monkeys, we did not record all three signals  
284 simultaneously because of technical difficulties (see Methods). Nonetheless, the weak tuning  
285 of EEG gamma was observed in humans also<sup>29</sup>, and is therefore likely to be a general feature  
286 of EEG signals. However, note that the similarity in tuning profile of LFP and ECoG gamma  
287 rhythms for different stimulus manipulations could be because of a coherent network because  
288 of the use of full screen gratings at full contrast which are known to produce strong and  
289 coherent gamma rhythms<sup>16,17</sup> over a large brain area. Both the microelectrodes and  
290 macroelectrodes captured the activity of this network and therefore showed similar tuning  
291 preferences. Interestingly, ECoG electrodes which were on the surface of cortex captured this  
292 activity as reliably as microelectrodes which were presumably in the superficial layers of the  
293 cortex. Apart from the stimulus, another factor that could have influenced our results is volume  
294 conduction<sup>49,50</sup>. In a previous study<sup>50</sup>, in which we recorded from microelectrodes implanted

295 in Monkeys 1 and 2, we showed that the LFP-LFP phase coherence almost becomes flat for  
296 CSD (current source density, a double spatial derivative of potential, obtained by subtracting  
297 the potential of an electrode from the potentials of four neighboring electrodes; see Fig 4A of  
298 Ref<sup>50</sup>). Since, we had only five (Monkey 3) and four (Monkey 4) ECoG electrodes, the CSD  
299 analysis could not be performed for ECoG in the current setup.

300

301 As described earlier in Results section, the tuning parameters depended critically on the low  
302 frequency limit of the gamma band. This is because the actual power (not change in power  
303 which is displayed in the figures) falls off rapidly with frequency and displays a prominent  
304 “1/f” structure. The total power in a band is therefore dominated by the lower frequencies that  
305 have larger absolute power. For example, in the orientation tuning experiment, gamma peak  
306 was strongest for the stimulus orientation of 90° but also the fastest (peak around ~55 Hz) for  
307 Monkey 3 (Figure 5A). Orientation of 0° produced a smaller bump, but since it was around 40  
308 Hz, the power between 35-40 Hz was more for 0° stimulus than 90°. However, if we had chosen  
309 the gamma band between 35-70 Hz, the preferred orientation would have shifted towards 0°  
310 just because the absolute power between 35-40 Hz far exceeds the power between 50-60 Hz.  
311 This issue can be partially addressed by using the normalized instead of absolute power while  
312 computing the power in a band, but in general, it is difficult to compare gamma power across  
313 stimulus conditions when the peak frequency itself shifts with stimulus.

314

315 In our case, the choice of frequency band is of less relevance because the actual power spectra  
316 for LFP and ECoG were remarkably similar for every stimulus condition: if the gamma peak  
317 did not fall in a specified range for LFP, it invariably fell outside the range for ECoG as well.  
318 Therefore, our main result that LFP and ECoG gamma tuning is remarkably similar holds  
319 irrespective of the choice of the frequency band.

320 Although the overall trends were similar for Monkeys 3 and 4, the strength of tuning was  
321 different. For example, orientation selectivity was different for the two monkeys for LFP  
322 gamma whereas ECoG gamma showed comparable selectivity (Figure 5D and 5H). One reason  
323 could be because the LFP receptive field locations were very foveal in case of Monkey 4  
324 (Figure 5G), although the foveal ECoG electrodes in both the monkeys showed strong  
325 orientation tuning (Figure 5C and 5G). Moreover, Xu and colleagues<sup>51</sup> found no difference in  
326 orientation selectivity as a function of eccentricity in V1. We suspect that the main reason  
327 behind weaker LFP gamma in Monkey 4 is because the microelectrode array had earlier been  
328 explanted (see Methods for details), although it is unlikely that this affected any of the major  
329 results.

330 To conclude, our findings highlight the presence of gamma oscillations in ECoG which shows  
331 similar tuning preference to gamma oscillations observed in LFP recordings, even though the  
332 size of the ECoG electrode is several hundred times larger than the microelectrode. Therefore,  
333 ECoG gamma can act as a potent marker for the diagnosis of brain disorders such as autism  
334 and schizophrenia which have been associated with abnormal gamma rhythms<sup>52,53</sup>. Further,  
335 comparing the high-gamma activity between ECoG and LFP we showed that ECoG has local  
336 origins in V1. Together, our results validate the use of ECoG in brain-machine interface  
337 applications and basic science research.

## 338 **Methods**

### 339 *Animal preparation and Recording*

340 All animal experiments and protocols performed in this study are in strict accordance with the  
341 relevant guidelines and regulations approved by the Institutional Animal Care and Use  
342 Committee of Harvard Medical School (for Monkeys 1, 2) and Institutional Animal Ethics  
343 Committee (IAEC) of the Indian Institute of Science and the Committee for the Purpose of  
344 Control and Supervision of Experiments on Animals (CPCSEA) (for Monkeys 3 and 4). The  
345 details of our experiment design and data collection have been described in detail in our  
346 previous study<sup>37</sup>; here we explain them briefly. The microelectrode and ECoG data used in this  
347 study were collected in two separate set of experiments. The first set was conducted on two  
348 male monkeys (*Macaca mulatta*; 11 and 14 Kg); animal protocols approved by the Institutional  
349 Animal Care and Use Committee of Harvard Medical School. For this set of experiments,  
350 microelectrode and ECoG recordings were performed separately and are described in detail  
351 elsewhere<sup>17,27,54</sup>. Briefly, after monkeys learned the behavioral task, a 10x10 microelectrode  
352 grid (96 active channels, Blackrock Microsystems) was implanted in the right primary visual  
353 cortex (~15 mm anterior to the occipital ridge and ~15 mm lateral to the midline). The  
354 microelectrodes were 1 mm long separated by 400  $\mu\text{m}$ . After microelectrode recordings, a  
355 second surgery was performed to implant the custom-made array having 2 ECoG contacts (2.3  
356 mm in diameter and 10 mm apart, Ad-Tech Medical Instrument) on the left primary visual  
357 cortex of the same monkeys (see Materials and Methods of Ref 37, for details). One ECoG  
358 electrode in Monkey 2 did not show any stimulus evoked response and thus was excluded,  
359 yielding 3 ECoG electrodes from these two monkeys. Note that ECoG and microelectrode  
360 recordings were non-simultaneous for these two monkeys.

361



362 The second set of experiments involved simultaneous recordings of spikes, LFP and ECoG  
363 signals from two female adult monkeys (*Macaca radiata*; 3.3 and 4 Kg); animal protocols  
364 approved by the Institutional Animal Ethics Committee (IAEC) of the Indian Institute of  
365 Science and the Committee for the Purpose of Control and Supervision of Experiments on  
366 Animals (CPCSEA). Once the monkey had learned the fixation task, a custom-made hybrid  
367 array (see Figure 1 of Ref 37) was implanted in the left cerebral hemispheres. This hybrid array  
368 had 3x3 ECoG electrodes (Ad-tech Medical Instrument) and 9x9 microelectrodes, both  
369 attached to the same connector made by Blackrock Microsystems. The ECoG electrodes were  
370 platinum discs of exposed diameter of 2.3 mm and inter-electrode center- to-center distance of  
371 10 mm. The microelectrodes were 1 mm long, 400  $\mu$ m apart. The electrode array was implanted  
372 under general anesthesia; first a large craniotomy and a smaller durotomy were performed,  
373 subsequent to which the ECoG sheet was inserted subdurally such that the previously made  
374 silastic gap between four ECoG electrodes was in alignment with the durotomy (see Ref 37 for  
375 details). The microelectrode array was finally inserted into the gap, ~10 – 15 mm from the  
376 occipital ridge and ~10-15 mm from the midline. In Monkey 3, out of six ECoG electrodes  
377 which were posterior to lunate sulcus, one had noisy receptive field estimate, yielding 5 ECoG  
378 electrodes for further analysis. For Monkey 4, the ECoG grid did not slide smoothly on the  
379 cortex and one column (electrodes 1-3) had to be removed, yielding 4 ECoG electrodes in V1.  
380 Two reference wires, common for both microelectrode and ECoG grid were either inserted  
381 near the edge of the craniotomy or wounded over the titanium screws on the metal strap which  
382 was used to secure the bone on the craniotomy. Other findings based on data recorded from  
383 Monkeys 3 and 4 but from a different microelectrode array (implanted in the right hemisphere)  
384 have been reported elsewhere<sup>29,55</sup>.  
385

386 In case of Monkey 4, we used a hybrid array that had been implanted on a different monkey,  
387 but it had to be explanted after 2 days due to complications related to the surgery. One reference  
388 wire was lost during the process, and the insulation was removed from the other one (in  
389 Monkey 3, insulation from only the tip of the reference wires were removed). This could have  
390 led to higher noise in the LFP data collected from Monkey 4 at frequencies above 250 Hz,  
391 because the power spectral density appeared to be shallow than other monkeys. It is unlikely  
392 that this affected any of the results, since clear gamma rhythm and high-gamma activity were  
393 observed in the LFP, which were generally similar to the recordings done earlier using a fresh  
394 array implanted in the other hemisphere<sup>29</sup>. Further, ECoG electrodes that were simply placed  
395 on the cortex were unaffected by the explantation and showed strong gamma peaks.

396

397 All signals were recorded using Blackrock Microsystems data acquisition system (Cerebus  
398 Neural Signal Processor). Local field potential (LFP) and multi-unit activity (MUA) were  
399 recorded from microelectrode array. LFP and ECoG were obtained by band-pass filtering the  
400 raw data between 0.3 Hz (Butterworth filter, first order, analog) and 500 Hz (Butterworth filter,  
401 fourth order, digital), sampled at 2 kHz and digitized at 16-bit resolution. MUA was derived  
402 by filtering the raw signal between 250 Hz (Butterworth filter, fourth order, digital) and 7,500  
403 Hz (Butterworth filter, third order, analog), followed by an amplitude threshold (set at ~6.25  
404 (Monkey 1), ~4.25 (Monkey 2) and ~5 (Monkeys 3 and 4) of the SDs of the signal).

405

406 The data acquisition system has provisions to measure both the impedance of the electrodes as  
407 well as potential cross-talk across pairs of electrodes. The similarity in the gamma oscillations  
408 recorded in LFP and ECoG signals was not due to potential crosstalk between LFP and ECoG  
409 electrodes, which we could measure explicitly. Further, RF centers for LFP and ECoG  
410 electrodes were far apart (Figure 5C and 5G), and small stimuli that covered the RF of only

411 one signal produced salient gamma oscillations in that signal but virtually no response in the  
412 other, ruling out potential cross-talk influencing our results.

413

414 Previously we had also recorded EEG data from Monkeys 3 and 4 simultaneously with the  
415 LFP<sup>29</sup>. In this study, EEG signals were found to be extremely noisy. This was because a much  
416 larger craniotomy was needed to insert the ECoG array, and consequently a larger titanium  
417 mesh, longer plates and more screws were required to secure the bone flap. Further, as this was  
418 the second surgery on these monkeys, there was considerable hardware present on the other  
419 hemisphere from the first surgery as well. Consequently, there was hardly enough space to put  
420 EEG electrodes on the occipital areas, and those signals were noisy.

421

## 422 *Behavioral task*

423 Three separate datasets were used in this study. The first set was used to study the effect of size  
424 ('size study', Figures 1, 2, 3 and 4) on LFP and ECoG power and were collected from all four  
425 monkeys. The second and third data sets were collected from Monkeys 3 and 4 to study the  
426 effect of orientation and spatial frequency ('orientation and spatial frequency study', Figures 5  
427 and 6) and the effect of contrast ('contrast study', Figure 7) on LFP and ECoG power. The  
428 behavioral task and stimuli used in these studies are described below in detail.

429

## 430 *Size study*

431 The data set and results from microelectrode recordings from the first two monkeys have been  
432 reported previously<sup>17</sup>. The experimental design and behavioral task for ECoG recordings were  
433 similar. Monkeys 1 and 2 performed an orientation change task, while two achromatic odd-  
434 symmetric stimuli were presented synchronously for 400 ms with an inter-stimulus period of  
435 600 ms. A Grating stimulus of variable size centered on the receptive field of one of the

436 recording electrodes (new location for each session) was presented in the left hemifield for  
437 microelectrode recordings and right hemifield for ECoG recordings. The monkeys were cued  
438 to attend to a low-contrast Gabor stimulus outside of the receptive field (RF) and respond to a  
439 change in the orientation of the Gabor stimulus by  $90^\circ$  in one of the presentations. Monkeys  
440 responded by making a saccade within 500 ms of the orientation change. The Gratings were a  
441 static stimulus with a spatial frequency of 4 cycles/degree (cpd), full contrast, located at the  
442 center of the RF of one of the sites (different recording site each session), one of six different  
443 orientations ( $0^\circ$ ,  $30^\circ$ ,  $60^\circ$ ,  $90^\circ$ ,  $120^\circ$  and  $150^\circ$ ) and six different radii ( $0.3^\circ$ ,  $0.72^\circ$ ,  $1.14^\circ$ ,  $1.56^\circ$ ,  
444  $1.98^\circ$  and  $2.4^\circ$ ), chosen pseudo-randomly. For ECoG recordings in Monkey 2, only five radii  
445 were presented (up to  $1.98^\circ$ ), since the RF center of the ECoG electrode was very foveal  
446 (azimuth: 1.16, elevation: 1.83) and the largest stimulus ( $2.4^\circ$ ) covered the fixation spot. The  
447 Gabor stimulus presented outside the RF was also static with an SD of  $0.5^\circ$ , spatial frequency  
448 4 cpd and an average contrast of  $\sim 6\%$  and  $\sim 4.3\%$  for Monkeys 1 and 2. Monkeys 1 and 2  
449 performed the task in 10 and 24 recording sessions for microelectrode recordings (results  
450 presented in Ref 17; and 2 and 1 recordings sessions for ECoG recordings (one session for each  
451 ECoG electrode).

452

453 Monkeys 3 and 4 performed the fixation task while they were in a monkey chair, with their  
454 head fixed by the headpost. The monkeys were required to hold their gaze within  $2^\circ$  of a small  
455 central dot ( $0.10^\circ$  diameter) located at the center of a monitor (BenQ XL2411, LCD,  $1280 \times 720$   
456 pixels, 100 Hz refresh rate, gamma corrected) and were rewarded with a juice pulse at the end  
457 of the trial upon successful fixation. The stimulus was a Grating with a spatial frequency of 4  
458 cpd, full contrast, one of eight different orientations ( $0^\circ$ ,  $22.5^\circ$ ,  $45^\circ$ ,  $67.5^\circ$ ,  $90^\circ$ ,  $112.5^\circ$ ,  $135^\circ$  and  
459  $157.5^\circ$ ) and six different radii ( $0.3^\circ$ ,  $0.6^\circ$ ,  $1.2^\circ$ ,  $2.4^\circ$ ,  $4.8^\circ$  and  $9.6^\circ$ ), chosen pseudo-randomly,  
460 presented for 800 ms with an inter-stimulus period of 700 ms at the RF of one of the recording

461 sites (different recording site each session). The data were collected in 15 (Monkey 3) and 6  
462 (Monkey 4) recording sessions for microelectrode recordings and 5 (Monkey 3) and 4 (Monkey  
463 4) recording sessions for ECoG electrodes.

464

465 Only correct trials were used for analysis. For each stimulus size condition, the trials were  
466 pooled across orientations to increase the statistical power. The average number of repetitions  
467 for each size condition for LFP and ECoG were 182 (range 133 to 288) and 141 (range 129  
468 153) for Monkey 1, 145 (range 106 to 196) and 176 (range 173 to 179) for Monkey 2, 79 (range  
469 37 to 205) and 150 (range 92 to 189) for Monkey 3, and 91 (range 30 to 127) and 115 (range  
470 87 to 153) for Monkey 4.

471

#### 472 *Orientation and Spatial frequency tuning study*

473 A full-screen static Grating stimulus was presented for 800 ms with an inter-stimulus period of  
474 700 ms while Monkeys 3 and 4 performed a fixation task. The Gratings were presented at full  
475 contrast at one of five spatial frequencies (0.5, 1, 2, 4 and 8 cpd) and one of the eight  
476 orientations (0°, 22.5°, 45°, 67.5°, 90°, 112.5°, 135° and 157.5°) chosen pseudo-randomly. The  
477 effect of orientation was studied (Figure 5) at spatial frequency which produced highest power  
478 in gamma range (4 and 2 cpd for Monkeys 3 and 4). The average number of repetitions for  
479 each orientation condition and preferred spatial frequency were 33 (range 28 to 36) for Monkey  
480 3 and 42 (range 37 to 45) for Monkey 4. Similarly, the effect of spatial frequency was studied  
481 (Figure 6) at preferred orientation (~90°) which produced highest gamma power. The average  
482 number of repetitions were 33 (range 32 to 36) and 34 (range 15 to 45).

483

#### 484 *Contrast study*

485 The stimulus for Monkey 3 was a full-screen Grating at preferred spatial frequency (4 cpd),  
486 preferred orientation (90°), one of seven contrasts (100, 50, 25, 12.5, 6.25, 3.125 and 0%) and  
487 one of eight different temporal frequencies (tf = 50, 32, 16, 8, 4, 2, 1 and 0 cycle per second;  
488 counterphase). We studied (Figure 7) the effect of contrast for the static grating (tf = 0 cps);  
489 average number of repetitions was 17 (range 16 to 18). For Monkey 4, stimulus was a static  
490 full screen Grating at preferred spatial frequency (2 cpd), one of the six contrasts (100, 50, 25,  
491 12.5, 6.25 and 0%) and one of the eight orientations (0°, 22.5°, 45°, 67.5°, 90°, 112.5°, 135° and  
492 157.5°). Contrast tuning was studied at preferred orientation (90°); average number of  
493 repetitions was 27 (range 26 to 29). Both monkeys performed a fixation task and stimulus was  
494 presented for 800 ms with an inter-stimulus period of 700 ms.

495

#### 496 *Electrode selection*

497 Receptive fields were mapped by flashing small Gabor stimuli at various positions on the  
498 screen, as described in detail in our previous studies<sup>37,54</sup>. As in our previous studies, only  
499 electrodes for which the RF estimates were stable across days (SD less than 0.1°) were used  
500 for further analysis, yielding 27, 71, 77 and 18 microelectrodes and 2, 1, 5 and 4 ECoG  
501 electrodes from Monkeys 1, 2, 3 and 4.

502

503 For the size study, the smallest stimulus was of radius 0.3°, covering only a few  
504 microelectrodes in the visual field. Therefore, for each recording session, we selected  
505 electrodes whose RF centers were within 0.2° of the stimulus center. Since we recorded  
506 multiple sessions, the same electrode was counted more than once, yielding 56 (24 unique),  
507 141 (66 unique), 62 (40 unique) and 70 (18 unique) electrodes for Monkeys 1-4. Out of this  
508 set, we selected electrodes for which the average firing rate was at least 1 spike/s (for an  
509 analysis period of 200 to 400 ms for Monkeys 1 and 2 and 250 to 750 ms for Monkeys 3 and

510 4) for all the stimulus sizes, and a signal-to-noise ratio<sup>56</sup> greater than 1.5. This yielded 15 (11  
511 unique), 107 (58 unique), 24 (20 unique) and 22 (13 unique) electrodes for further analysis for  
512 the four monkeys.

513

514 For the orientation, spatial and contrast studies, full screen stimuli were used because that  
515 condition produced the strongest gamma. Consequently, firing rates were weak for most sites<sup>29</sup>.

516 Since our primary interest was to compare gamma power, we used the full set of 77 (Monkey  
517 3) and 18 (Monkey 4) microelectrodes and compared the power with 5 (Monkey 3) and 4  
518 (Monkey 4) ECoG electrodes.

519

## 520 *Data analysis*

521 All the data were analyzed using custom codes written in MATLAB (The MathWorks,  
522 RRID:SCR\_001622). Power spectral density (PSD) and the time-frequency spectra were  
523 computed using the multi-taper method with three tapers, implemented in Chronux 2.0 (Bokil  
524 et al., 2010, RRID:SCR\_005547), an open-source, data analysis toolbox available at  
525 <http://chronux.org>. The baseline period was chosen between -200 to 0 ms for Monkeys 1 and  
526 2 and -500 to 0 ms for Monkeys 3 and 4, where 0 indicates stimulus onset. Stimulus period  
527 was chosen between 200 to 400 ms for Monkeys 1 and 2 and 250 to 750 ms for Monkeys 3 and  
528 4 to avoid the stimulus-onset related transients.

529 Time-frequency difference spectra shown in Figure 2 were obtained by first computing the  
530 time-frequency power spectra using a moving window of size 250 ms and a step size of 25 ms  
531 and then subtracting the baseline power:

$$532 \quad D(t, w) = 10 \times (\log_{10}E(t, w) - \log_{10}B(w)) \quad (1)$$

533

534 Where  $E(t, w)$  is the mean energy averaged over trials at time  $t$  and frequency  $w$ , and  $B(w)$   
535 is the baseline energy computed for 500 ms (-500 to 0 ms before stimulus onset). Since  
536 subtraction is done on a log scale, this is essentially the log of the ratio of power at any time  
537 and the baseline power and has units of decibel (dB). For population data (Figure 2C and 2D),  
538 the  $D(t, w)$  values over recording sites were averaged. Note that the baseline energy was  
539 calculated across all the stimulus conditions for each recording site.

540

541 For the size study, gamma range was chosen between 30 – 65 Hz for all the four monkeys  
542 (Figure 3). This was done to accommodate the peak frequency for all stimulus sizes, as gamma  
543 peak frequency decreases with an increase in stimulus size<sup>17,28,29</sup>. The high-gamma range (150  
544 – 250 Hz) was chosen higher than usual (>80 Hz) to avoid the harmonic of gamma rhythm  
545 (~100 Hz, see Figure 3). The gamma frequency range for orientation and spatial frequency  
546 studies, in which a full-screen Grating was presented, was chosen to be 45 – 70 Hz for Monkeys  
547 3 and 4. This was done in congruence with our previous study<sup>29</sup> which used data from the same  
548 two monkeys (but different hemispheres), and to avoid contamination from ‘slow gamma’<sup>29</sup>  
549 which was prominent in Monkey 4. For the contrast study, gamma range was chosen between  
550 20 – 75 Hz. This was done to accommodate peak frequency for all stimulus contrast values,  
551 since gamma peak frequency has been shown to decrease considerably with a reduction in  
552 stimulus contrast<sup>27</sup>.

553

554 Power in gamma and high-gamma ranges were calculated by first averaging the power values  
555 obtained from the PSDs in the corresponding frequency ranges, excluding line noise (60 Hz  
556 for Monkeys 1, 2 and 50 Hz for Monkeys 3, 4) and their harmonics. Change in power for each  
557 stimulus condition was then calculated as follows:

558



559  $\Delta Power_i = 10(\log_{10} ST_i - BL_{ave})$  (2)

560

561 where  $ST_i$  is the power summed across the frequency range of interest for stimulus condition  
562  $i$ , and  $BL_{ave}$  is the baseline power averaged across conditions ( $BL_{ave} = average(\log_{10} BL_i)$ ).

563

564 Preferred orientation and orientation selectivity for each recording site were calculated using  
565 the following equations:

566

567  $Preferred\ orientation = \tan^{-1}\left(\frac{\sum_{i=1}^N R_i \sin(2\theta_i)}{\sum_{i=1}^N R_i \cos(2\theta_i)}\right)$  (3)

568

569  $Orientation\ selectivity = \frac{|\sum_{i=1}^N R_i e^{j \cdot 2\theta_i}|}{\sum_{i=1}^N R_i}$  (4)

570

571 where  $\theta_i$  and  $R_i$  are the orientations and sum of the power in gamma band.  $N$  is the total number  
572 of orientation values (8).

573

574 The slopes (Figure 4) were calculated for stimulus (200 to 400 ms for Monkeys 1, 2 and 250  
575 to 500 ms for Monkeys 3, 4) and baseline (-200 to 0 ms for Monkeys 1, 2 and -500 to 0 ms for  
576 Monkeys 3 and 4) periods in high-gamma frequency range (150 – 250 Hz) by fitting the  
577 function  $\log_{10}(P) = m * \log_{10}(f) + c$ , where  $P$  is the PSD,  $f$  is the frequency,  $c$  is the constant  
578 or noise floor and  $m$  is the slope<sup>40,57</sup>. In this frequency range, the amplifier roll off is negligible,  
579 and therefore the slopes are similar with or without amplifier roll-off correction<sup>40</sup>. We also  
580 tested the amplifier noise floor by shorting the inputs and found the power to be at least an  
581 order of magnitude lower than the signal power. Therefore, the estimated slopes did not depend  
582 on the characteristics of the amplifier.

## 583 **References**

- 584 1. Engel, A. K., Moll, C. K. E., Fried, I. & Ojemann, G. A. Invasive recordings from the human  
585 brain: clinical insights and beyond. *Nat. Rev. Neurosci.* **6**, 35–47 (2005).
- 586 2. Mukamel, R. *et al.* Coupling between neuronal firing, field potentials, and fMRI in human  
587 auditory cortex. *Science* **309**, 951–954 (2005).
- 588 3. Yoshor, D., Bosking, W. H., Ghose, G. M. & Maunsell, J. H. R. Receptive Fields in Human  
589 Visual Cortex Mapped with Surface Electrodes. *Cereb. Cortex* **17**, 2293–2302 (2007).
- 590 4. Mukamel, R. & Fried, I. Human Intracranial Recordings and Cognitive Neuroscience. *Annu.*  
591 *Rev. Psychol.* **63**, 511–537 (2011).
- 592 5. Lachaux, J.-P., Axmacher, N., Mormann, F., Halgren, E. & Crone, N. E. High-frequency  
593 neural activity and human cognition: past, present and possible future of intracranial EEG  
594 research. *Prog. Neurobiol.* **98**, 279–301 (2012).
- 595 6. Morshed, B. I. & Khan, A. A Brief Review of Brain Signal Monitoring Technologies for  
596 BCI Applications: Challenges and Prospects. *J. Bioeng. Biomed. Sci.* **4**, 1–10 (2014).
- 597 7. Yang, T., Hakimian, S. & Schwartz, T. H. Intraoperative ElectroCorticoGraphy (ECog):  
598 indications, techniques, and utility in epilepsy surgery. *Epileptic. Disord.* 271–279 (2014).  
599 doi:10.1684/epd.2014.0675
- 600 8. Winawer, J. & Parvizi, J. Linking Electrical Stimulation of Human Primary Visual Cortex,  
601 Size of Affected Cortical Area, Neuronal Responses, and Subjective Experience. *Neuron*  
602 **92**, 1213–1219 (2016).
- 603 9. Kucewicz, M. T. *et al.* Dissecting gamma frequency activity during human memory  
604 processing. *Brain J. Neurol.* **140**, 1337–1350 (2017).
- 605 10. Parvizi, J. & Kastner, S. Promises and limitations of human intracranial  
606 electroencephalography. *Nat. Neurosci.* **21**, 474–483 (2018).

- 607 11. Crone, N. E., Sinai, A. & Korzeniewska, A. High-frequency gamma oscillations and  
608 human brain mapping with electrocorticography. *Prog. Brain Res.* **159**, 275–295 (2006).
- 609 12. Crone, N. E., Korzeniewska, A. & Franaszczuk, P. J. Cortical  $\gamma$  responses: searching high  
610 and low. *Int. J. Psychophysiol. Off. J. Int. Organ. Psychophysiol.* **79**, 9–15 (2011).
- 611 13. Ray, S., Crone, N. E., Niebur, E., Franaszczuk, P. J. & Hsiao, S. S. Neural Correlates of  
612 High-Gamma Oscillations (60–200 Hz) in Macaque Local Field Potentials and Their  
613 Potential Implications in Electrocorticography. *J. Neurosci.* **28**, 11526–11536 (2008).
- 614 14. Liu, J. & Newsome, W. T. Local field potential in cortical area MT: stimulus tuning and  
615 behavioral correlations. *J. Neurosci. Off. J. Soc. Neurosci.* **26**, 7779–7790 (2006).
- 616 15. Manning, J. R., Jacobs, J., Fried, I. & Kahana, M. J. Broadband shifts in local field potential  
617 power spectra are correlated with single-neuron spiking in humans. *J. Neurosci. Off. J. Soc.*  
618 *Neurosci.* **29**, 13613–13620 (2009).
- 619 16. Jia, X., Smith, M. A. & Kohn, A. Stimulus selectivity and spatial coherence of gamma  
620 components of the local field potential. *J. Neurosci. Off. J. Soc. Neurosci.* **31**, 9390–9403  
621 (2011).
- 622 17. Ray, S. & Maunsell, J. H. R. Different Origins of Gamma Rhythm and High-Gamma  
623 Activity in Macaque Visual Cortex. *PLoS Biol* **9**, e1000610 (2011).
- 624 18. Rodriguez, E. *et al.* Perception's shadow: long-distance synchronization of human brain  
625 activity. *Nature* **397**, 430–433 (1999).
- 626 19. Fries, P., Reynolds, J. H., Rorie, A. E. & Desimone, R. Modulation of Oscillatory Neuronal  
627 Synchronization by Selective Visual Attention. *Science* **291**, 1560–1563 (2001).
- 628 20. Pesaran, B., Pezaris, J. S., Sahani, M., Mitra, P. P. & Andersen, R. A. Temporal structure  
629 in neuronal activity during working memory in macaque parietal cortex. *Nat. Neurosci.* **5**,  
630 805–811 (2002).

- 631 21. Womelsdorf, T., Fries, P., Mitra, P. P. & Desimone, R. Gamma-band synchronization in  
632 visual cortex predicts speed of change detection. *Nature* **439**, 733–736 (2006).
- 633 22. Melloni, L. *et al.* Synchronization of neural activity across cortical areas correlates with  
634 conscious perception. *J. Neurosci. Off. J. Soc. Neurosci.* **27**, 2858–2865 (2007).
- 635 23. Colgin, L. L. *et al.* Frequency of gamma oscillations routes flow of information in the  
636 hippocampus. *Nature* **462**, 353–357 (2009).
- 637 24. Gregoriou, G. G., Gotts, S. J., Zhou, H. & Desimone, R. High-frequency, long-range  
638 coupling between prefrontal and visual cortex during attention. *Science* **324**, 1207–1210  
639 (2009).
- 640 25. Henrie, J. A. & Shapley, R. LFP Power Spectra in V1 Cortex: The Graded Effect of  
641 Stimulus Contrast. *J. Neurophysiol.* **94**, 479–490 (2005).
- 642 26. Gieselmann, M. A. & Thiele, A. Comparison of spatial integration and surround  
643 suppression characteristics in spiking activity and the local field potential in macaque V1.  
644 *Eur. J. Neurosci.* **28**, 447–459 (2008).
- 645 27. Ray, S. & Maunsell, J. H. R. Differences in Gamma Frequencies across Visual Cortex  
646 Restrict Their Possible Use in Computation. *Neuron* **67**, 885–896 (2010).
- 647 28. Jia, X., Xing, D. & Kohn, A. No Consistent Relationship between Gamma Power and Peak  
648 Frequency in Macaque Primary Visual Cortex. *J. Neurosci.* **33**, 17–25 (2013).
- 649 29. Murty, D. V. P. S., Shirhatti, V., Ravishankar, P. & Ray, S. Large visual stimuli induce  
650 two distinct gamma oscillations in primate visual cortex. *J. Neurosci.* 2270–17 (2018).  
651 doi:10.1523/JNEUROSCI.2270-17.2017
- 652 30. Rols, G., Tallon-Baudry, C., Girard, P., Bertrand, O. & Bullier, J. Cortical mapping of  
653 gamma oscillations in areas V1 and V4 of the macaque monkey. *Vis. Neurosci.* **18**, 527–  
654 540 (2001).

- 655 31. Adjamian, P. *et al.* Induced visual illusions and gamma oscillations in human primary  
656 visual cortex. *Eur. J. Neurosci.* **20**, 587–592 (2004).
- 657 32. Hall, S. D. *et al.* The missing link: analogous human and primate cortical gamma  
658 oscillations. *NeuroImage* **26**, 13–17 (2005).
- 659 33. Swettenham, J. B., Muthukumaraswamy, S. D. & Singh, K. D. Spectral Properties of  
660 Induced and Evoked Gamma Oscillations in Human Early Visual Cortex to Moving and  
661 Stationary Stimuli. *J. Neurophysiol.* **102**, 1241–1253 (2009).
- 662 34. Muthukumaraswamy, S. D. & Singh, K. D. Visual gamma oscillations: the effects of  
663 stimulus type, visual field coverage and stimulus motion on MEG and EEG recordings.  
664 *NeuroImage* **69**, 223–230 (2013).
- 665 35. Perry, G., Hamandi, K., Brindley, L. M., Muthukumaraswamy, S. D. & Singh, K. D. The  
666 properties of induced gamma oscillations in human visual cortex show individual  
667 variability in their dependence on stimulus size. *NeuroImage* **68**, 83–92 (2013).
- 668 36. Hermes, D., Miller, K. J., Wandell, B. A. & Winawer, J. Stimulus Dependence of Gamma  
669 Oscillations in Human Visual Cortex. *Cereb. Cortex N. Y. N 1991* **25**, 2951–2959 (2015).
- 670 37. Dubey, A. & Ray, S. Cortical Electrocorticogram (ECoG) Is a Local Signal. *J. Neurosci.*  
671 **39**, 4299–4311 (2019).
- 672 38. Mitra, P. P. & Pesaran, B. Analysis of dynamic brain imaging data. *Biophys. J.* **76**, 691–  
673 708 (1999).
- 674 39. Bokil, H., Andrews, P., Kulkarni, J. E., Mehta, S. & Mitra, P. Chronux: A Platform for  
675 Analyzing Neural Signals. *J. Neurosci. Methods* **192**, 146–151 (2010).
- 676 40. Shirhatti, V., Borthakur, A. & Ray, S. Effect of Reference Scheme on Power and Phase of  
677 the Local Field Potential. *Neural Comput.* **28**, 882–913 (2016).
- 678 41. Hubel, D. H. & Wiesel, T. N. Receptive fields, binocular interaction and functional  
679 architecture in the cat's visual cortex. *J. Physiol.* **160**, 106 (1962).

- 680 42. Hubel, D. H. & Wiesel, T. N. Receptive fields and functional architecture of monkey striate  
681 cortex. *J. Physiol.* **195**, 215 (1968).
- 682 43. Hubel, D. H. & Wiesel, T. N. Ferrier Lecture: Functional Architecture of Macaque Monkey  
683 Visual Cortex. *Proc. R. Soc. Lond. B Biol. Sci.* **198**, 1–59 (1977).
- 684 44. Berens, P., Keliris, G. A., Ecker, A. S., Logothetis, N. K. & Tolias, A. S. Comparing the  
685 Feature Selectivity of the Gamma-Band of the Local Field Potential and the Underlying  
686 Spiking Activity in Primate Visual Cortex. *Front. Syst. Neurosci.* **2**, (2008).
- 687 45. Xing, D., Yeh, C.-I. & Shapley, R. M. Spatial Spread of the Local Field Potential and its  
688 Laminar Variation in Visual Cortex. *J. Neurosci.* **29**, 11540–11549 (2009).
- 689 46. Canolty, R. T. *et al.* High gamma power is phase-locked to theta oscillations in human  
690 neocortex. *Science* **313**, 1626–1628 (2006).
- 691 47. Buschman, T. J. & Miller, E. K. Top-down versus bottom-up control of attention in the  
692 prefrontal and posterior parietal cortices. *Science* **315**, 1860–1862 (2007).
- 693 48. He, B. J., Zempel, J. M., Snyder, A. Z. & Raichle, M. E. The temporal structures and  
694 functional significance of scale-free brain activity. *Neuron* **66**, 353–369 (2010).
- 695 49. Pesaran, B. *et al.* Investigating large-scale brain dynamics using field potential recordings:  
696 analysis and interpretation. *Nat. Neurosci.* **21**, 903–919 (2018).
- 697 50. Srinath, R. & Ray, S. Effect of amplitude correlations on coherence in the local field  
698 potential. *J. Neurophysiol.* **112**, 741–751 (2014).
- 699 51. Xu, X., Anderson, T. J. & Casagrande, V. A. How do functional maps in primary visual  
700 cortex vary with eccentricity? *J. Comp. Neurol.* **501**, 741–755 (2007).
- 701 52. Uhlhaas, P. J. & Singer, W. Abnormal neural oscillations and synchrony in schizophrenia.  
702 *Nat. Rev. Neurosci.* **11**, 100–113 (2010).
- 703 53. Uhlhaas, P. J. & Singer, W. Neuronal dynamics and neuropsychiatric disorders: toward a  
704 translational paradigm for dysfunctional large-scale networks. *Neuron* **75**, 963–980 (2012).

- 705 54. Dubey, A. & Ray, S. Spatial spread of local field potential is band-pass in the primary  
706 visual cortex. *J. Neurophysiol.* **116**, 1986–1999 (2016).
- 707 55. Shirhatti, V. & Ray, S. Long-wavelength (reddish) hues induce unusually large gamma  
708 oscillations in the primate primary visual cortex. *Proc. Natl. Acad. Sci. U. S. A.* **115**, 4489–  
709 4494 (2018).
- 710 56. Kelly, R. C. *et al.* Comparison of Recordings from Microelectrode Arrays and Single  
711 Electrodes in the Visual Cortex. *J. Neurosci.* **27**, 261–264 (2007).
- 712 57. Miller, K. J., Sorensen, L. B., Ojemann, J. G. & Nijs, M. den. Power-Law Scaling in the  
713 Brain Surface Electric Potential. *PLOS Comput. Biol.* **5**, e1000609 (2009).
- 714

## 715 **Acknowledgements**

716 We thank Dr. John Maunsell for his help in experimental design and data collection from  
717 Monkeys 1 and 2 and Steven Sleboda and Vivian Imamura for technical support. We thank  
718 Ad-Tech Medical Instrument Corporation and Blackrock Microsystems for the hybrid  
719 electrode grid. We also thank Dr. Sebastian Chandu for his assistance in surgeries. This work  
720 was supported by Wellcome Trust/DBT India Alliance (500145/Z/09/Z; Intermediate  
721 fellowship to SR), Tata Trusts Grant and DBT-IISc Partnership Programme.

722

## 723 **Author contributions**

724 A.D. and S.R. conceptualized the study. S.R. collected the data from Monkeys 1 and 2 and  
725 A.D. is responsible for data from Monkeys 3 and 4. A.D. analyzed the data and wrote the first  
726 draft of the manuscript. A.D. and S.R. were involved in editing of the manuscript.

727

## 728 **Competing interests**

729 The authors declare no competing interests.

730

## 731 **Corresponding author**

732 Correspondence to Supratim Ray (sray@iisc.ac.in).

733

## 734 **Data availability**

735 The datasets analyzed during the current study are available from the corresponding author on  
736 reasonable request.

737



## 738 **Figure Legends**

739

740 **Figure 1: Spiking activity for different stimulus sizes.** (A) Raster plots showing spiking  
741 activity in individual trials for each stimulus size for an example unit from Monkey 3. Each  
742 row represents a trial. The peristimulus histogram, averaged across trials is overlaid on the  
743 raster plots. (B) Averaged firing rates for six stimulus sizes shown as different color traces for  
744 Monkeys 1, 2, 3 and 4.

745

746 **Figure 2: Gamma oscillations and high-gamma activity as a function of stimulus size in**  
747 **LFP and ECoG for Monkey 3.** (A) Time-frequency energy difference plots (in dB) showing  
748 the difference in energy relative to baseline energy (-500 to 0 ms, 0 denotes the stimulus onset,  
749 stimulus is presented from 0 to 800 ms) for six stimulus radii (labelled above the plots in  
750 degrees) for an example LFP recording site (same as shown in Figure 1A). The gamma rhythm  
751 at ~50 Hz increases with size, while the high-band activity above the gamma band decreases  
752 with size. (B) same as A for an example ECoG recording site. (C–D) show the corresponding  
753 population responses of 24 LFP and 5 ECoG recording sites.

754

755 **Figure 3: Tuning of gamma oscillations and high-gamma activity for stimulus size.** (A, C)  
756 Average relative change in power spectra between 200 and 400 ms from baseline energy (-200  
757 to 0 ms) for 15 and 107 LFP recordings sites (top panel), 2 and 1 ECoG recording sites (bottom  
758 panel) for Monkeys 1 and 2. (E, G) same as A, C but for 24 and 22 LFP recordings sites (top  
759 panel), 5 and 4 ECoG recording sites (bottom panel) for Monkeys 3 and 4. The change in power  
760 is computed between 250 to 750 ms relative to baseline energy (-500 to 0 ms). (B, D, F and  
761 H) Change in LFP (magenta) and ECoG (blue) for gamma (30 – 65 Hz) and high-gamma (150

762 – 250 Hz) frequency bands as a function of stimulus size. Error bar indicates SEs of the mean.

763 Note that the stimulus radii for Monkeys 1 and 2 are different from Monkeys 3 and 4.

764

765 **Figure 4: Slope of the high-gamma activity for 0.3° stimulus.** The slope of LFP (magenta)  
766 and ECoG (blue) electrodes computed for high-gamma frequency range (150 – 250 Hz) for  
767 baseline period is plotted in x-axis and for stimulus period in y-axis. The four monkeys are  
768 represented using four different marker types.

769

770 **Figure 5: Orientation tuning of gamma oscillations in LFP and ECoG.** (A) Average  
771 relative change in power spectra between 250 and 750 ms from baseline energy (-500 to 0 ms)  
772 for 77 LFP (top panel) and 5 ECoG recording sites (bottom panel) for Monkey 3. Eight colored  
773 traces are for eight different orientation values (labelled at the centre of Figure). (B) Average  
774 change in gamma power as a function of orientation (top panel) and the histogram of orientation  
775 preference (bottom panel) across recording sites for LFP (magenta) and ECoG (blue). Error  
776 bar indicates SEs of the mean. (C) Orientation preference of gamma rhythm across LFP (circle)  
777 and ECoG (diamond) recording sites plotted at the respective RF centers. The color represents  
778 the preferred orientation while the size of the marker represents the strength of tuning. (D)  
779 Median orientation selectivity of LFP and ECoG across recording sites. Error bar indicates SEs  
780 of the median, computed using bootstrapping. The orange circles are the five ECoG electrodes.  
781 (E–H) same as A–D but for 18 LFP and 4 ECoG recording sites in Monkey 4.

782

783 **Figure 6: Spatial frequency tuning of gamma oscillations in LFP and ECoG.** (A, C) Mean  
784 change in power spectra across 77 and 18 LFP recording sites (top panel), 5 and 4 ECoG  
785 recording sites (bottom panel) for Monkeys 3 and 4 calculated at stimulus orientations that  
786 induce largest power change in gamma (90° for both monkeys). Five colored traces represent

787 five different spatial frequency values. **(B, D)** left panel: Average change in gamma power as  
788 a function of spatial frequency for LFP (magenta) and ECoG (blue). right panel: Average  
789 gamma peak frequency as a function of spatial frequency. 8 cpd was ignored as the gamma  
790 peak was out of the selected frequency range. Error bar indicates SEs of the mean.

791

792 **Figure 7: Contrast tuning of gamma oscillations in LFP and ECoG.** **(A, C)** Mean change  
793 in power spectra across 77 and 18 LFP recording sites (top panel), 5 and 4 ECoG recording  
794 sites (bottom panel) for Monkeys 3 and 4 calculated at stimulus orientations and spatial  
795 frequencies that induce largest power change in gamma (90° and 4cpd for Monkey 3 and 90°  
796 and 2cpd for Monkey 4) . Seven colored traces represent seven different contrast values. Note  
797 that for Monkey 4 there are only six traces. **(B, D)** left panel: Average change in gamma power  
798 as a function of contrast for LFP (magenta) and ECoG (blue). right panel: Average gamma  
799 peak frequency as a function of contrast. Error bar indicates SEs of the mean.

**A**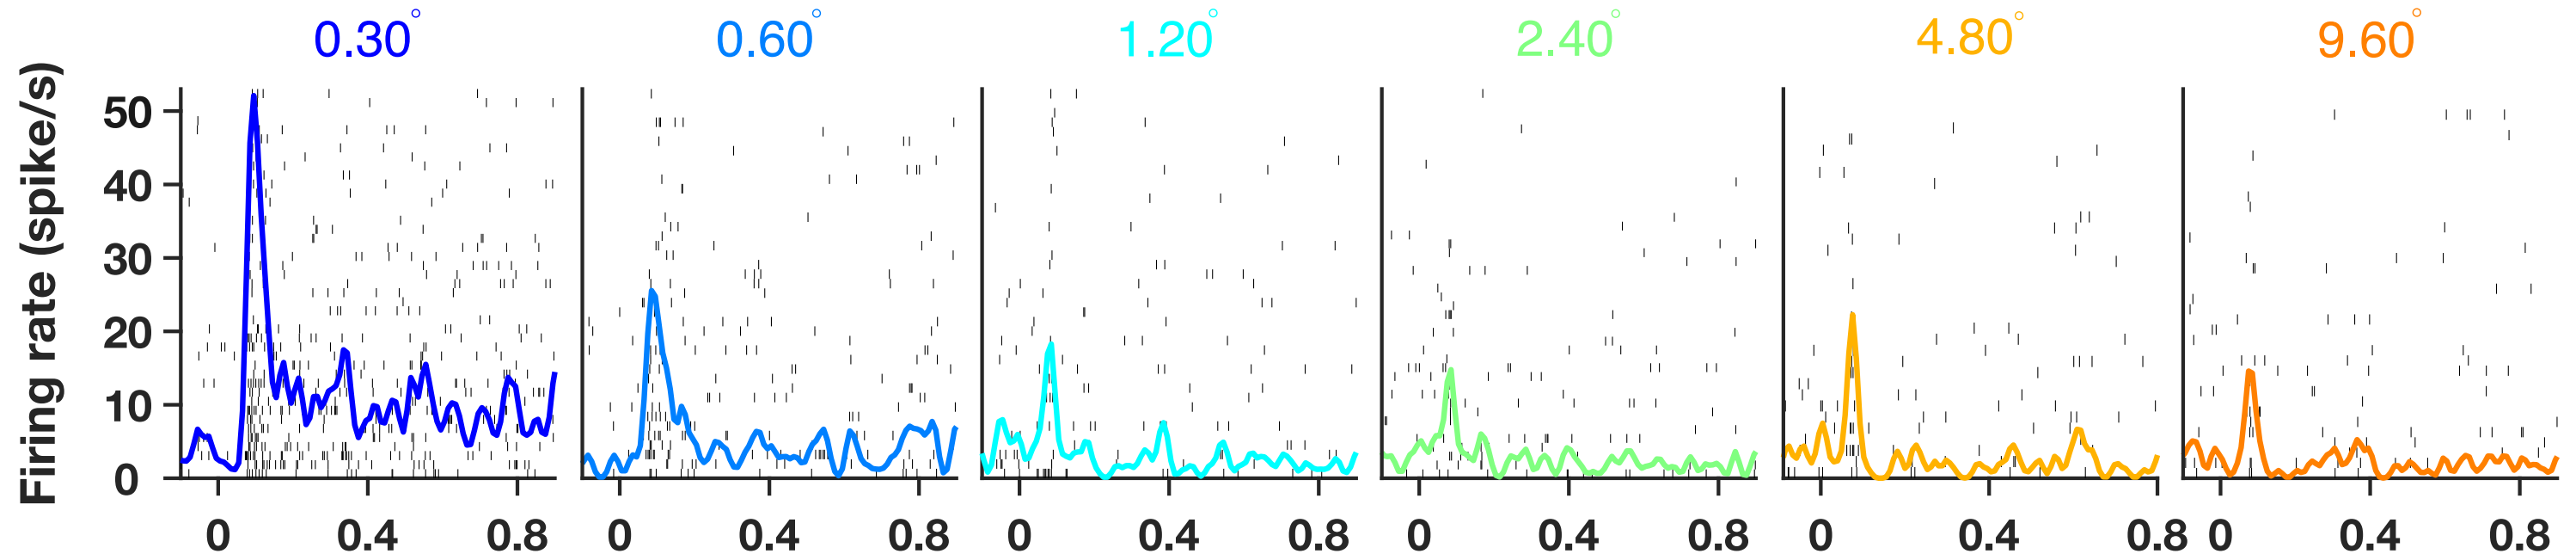**B**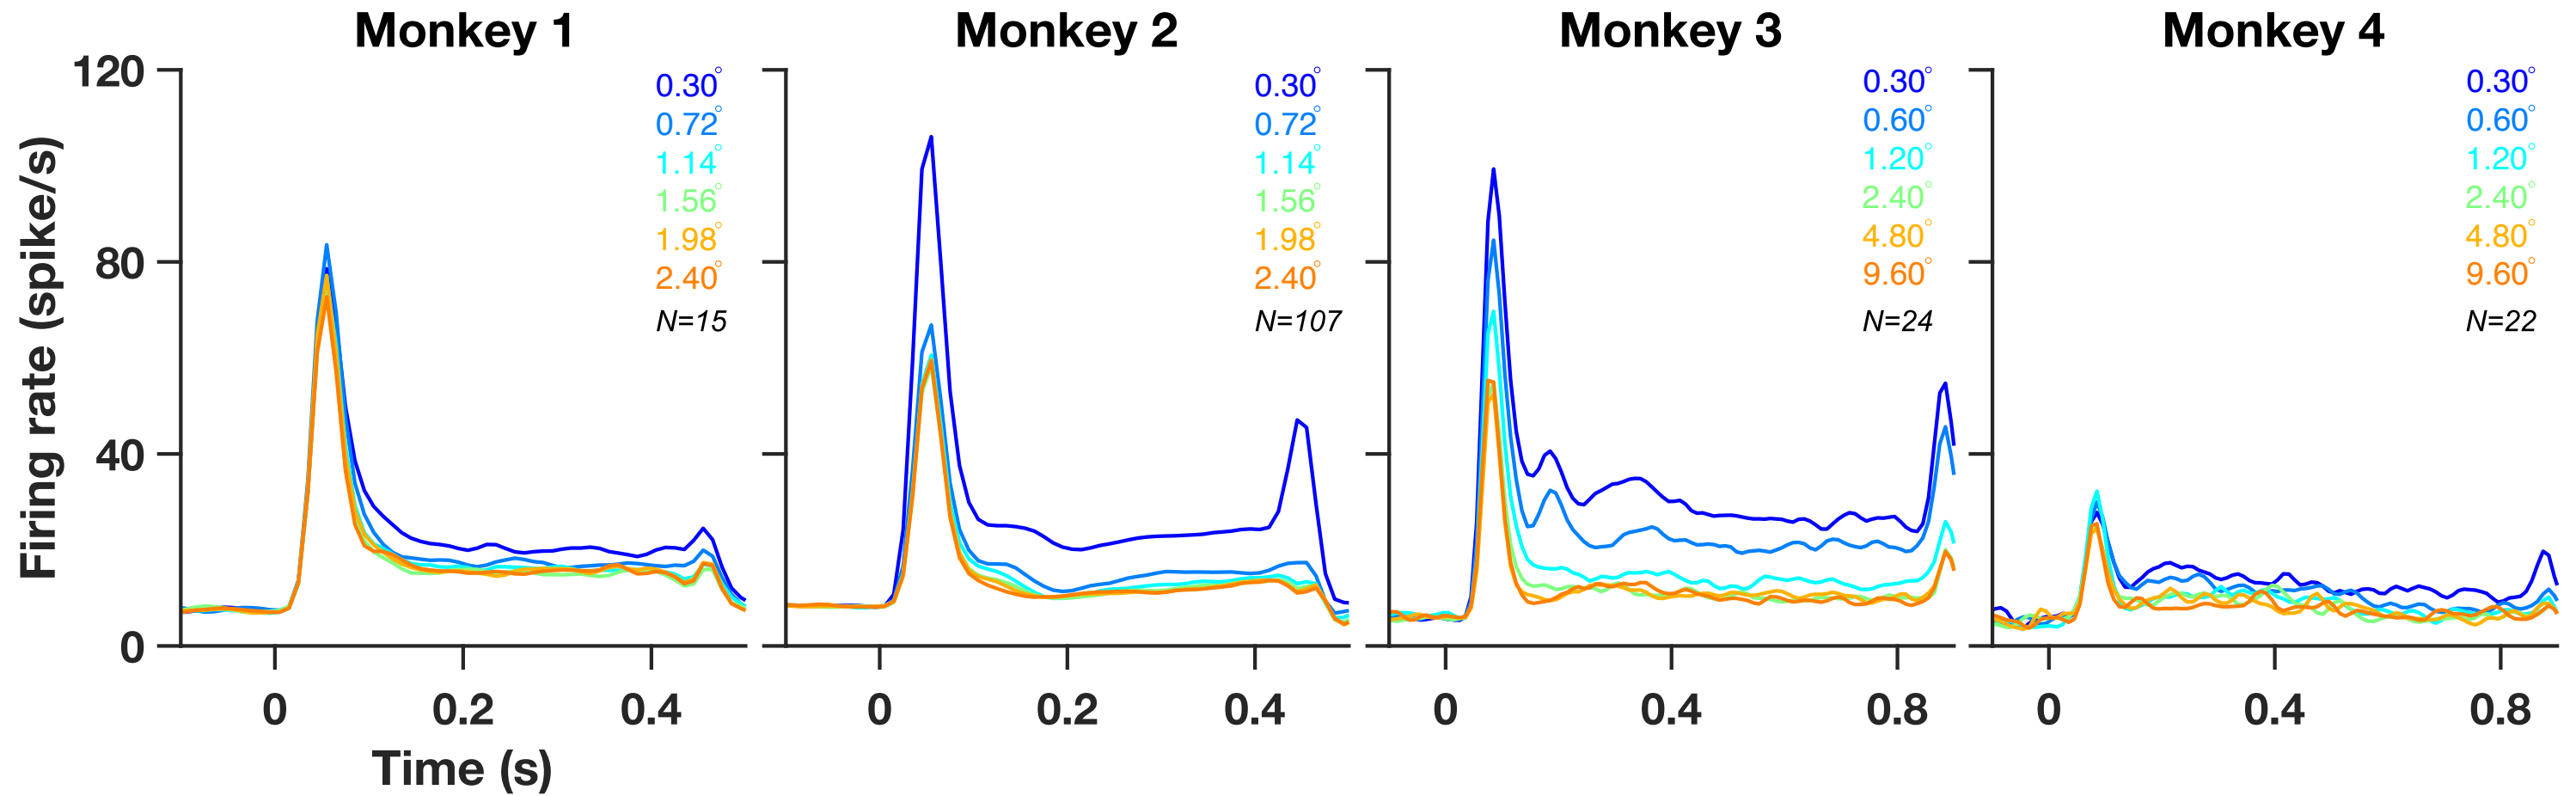

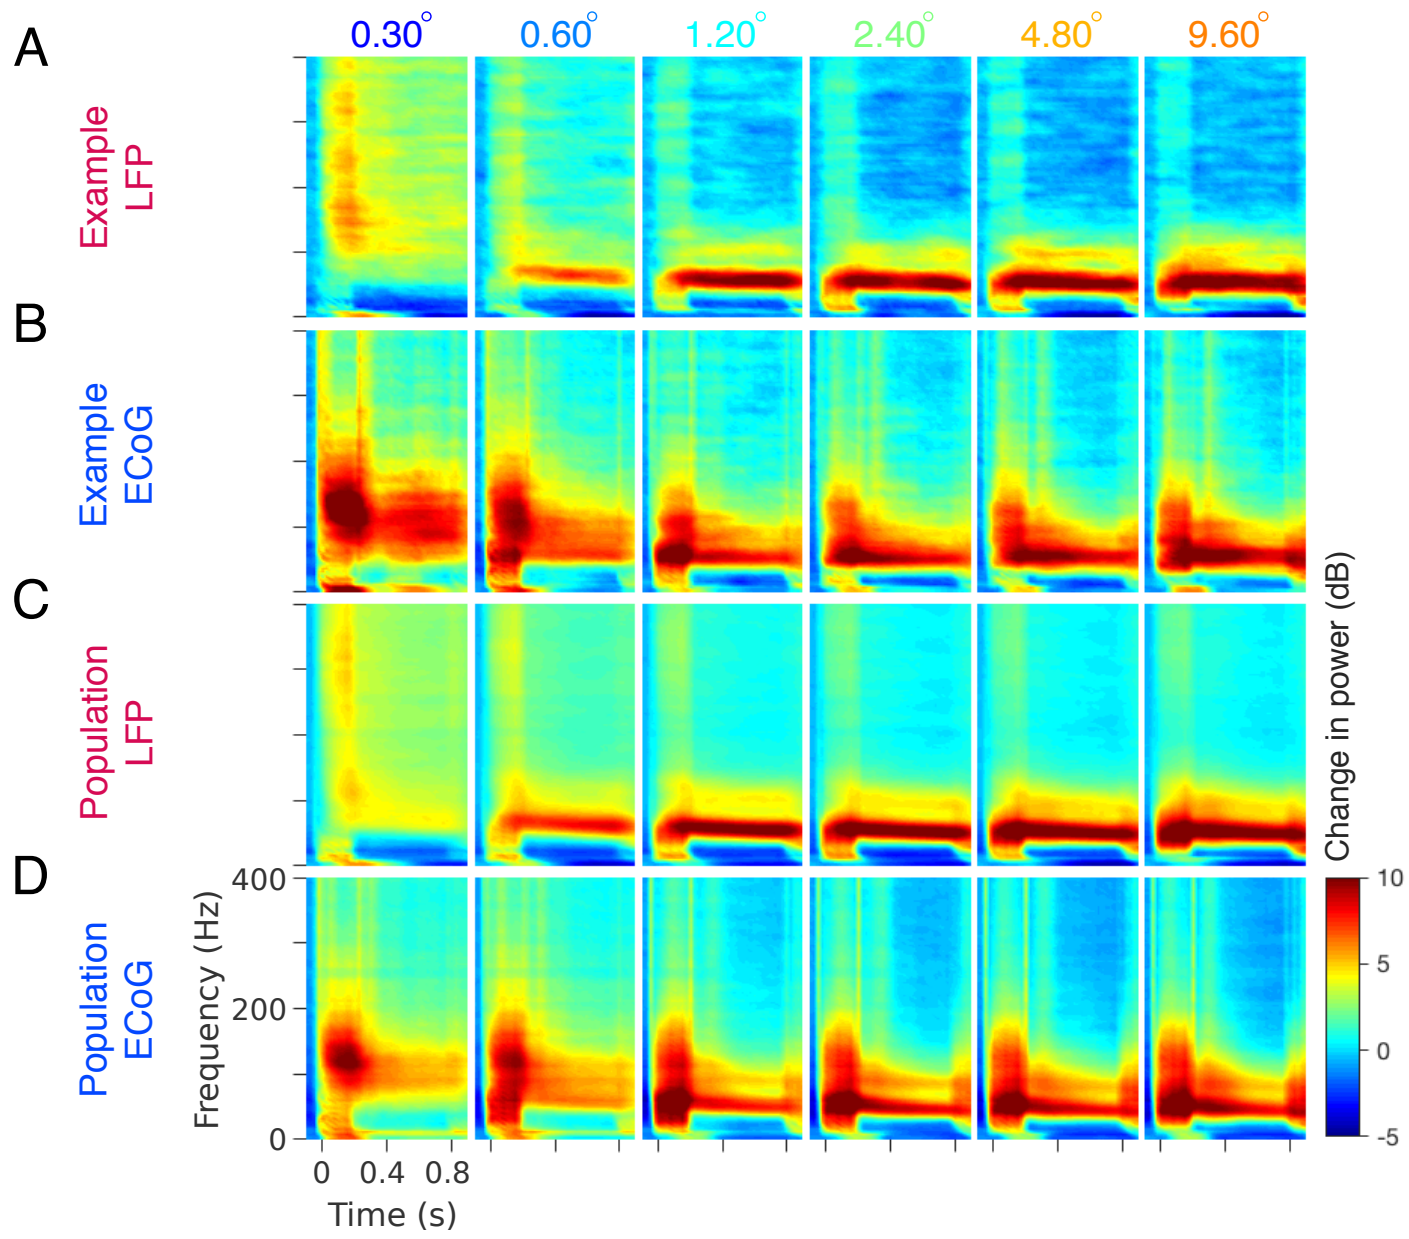

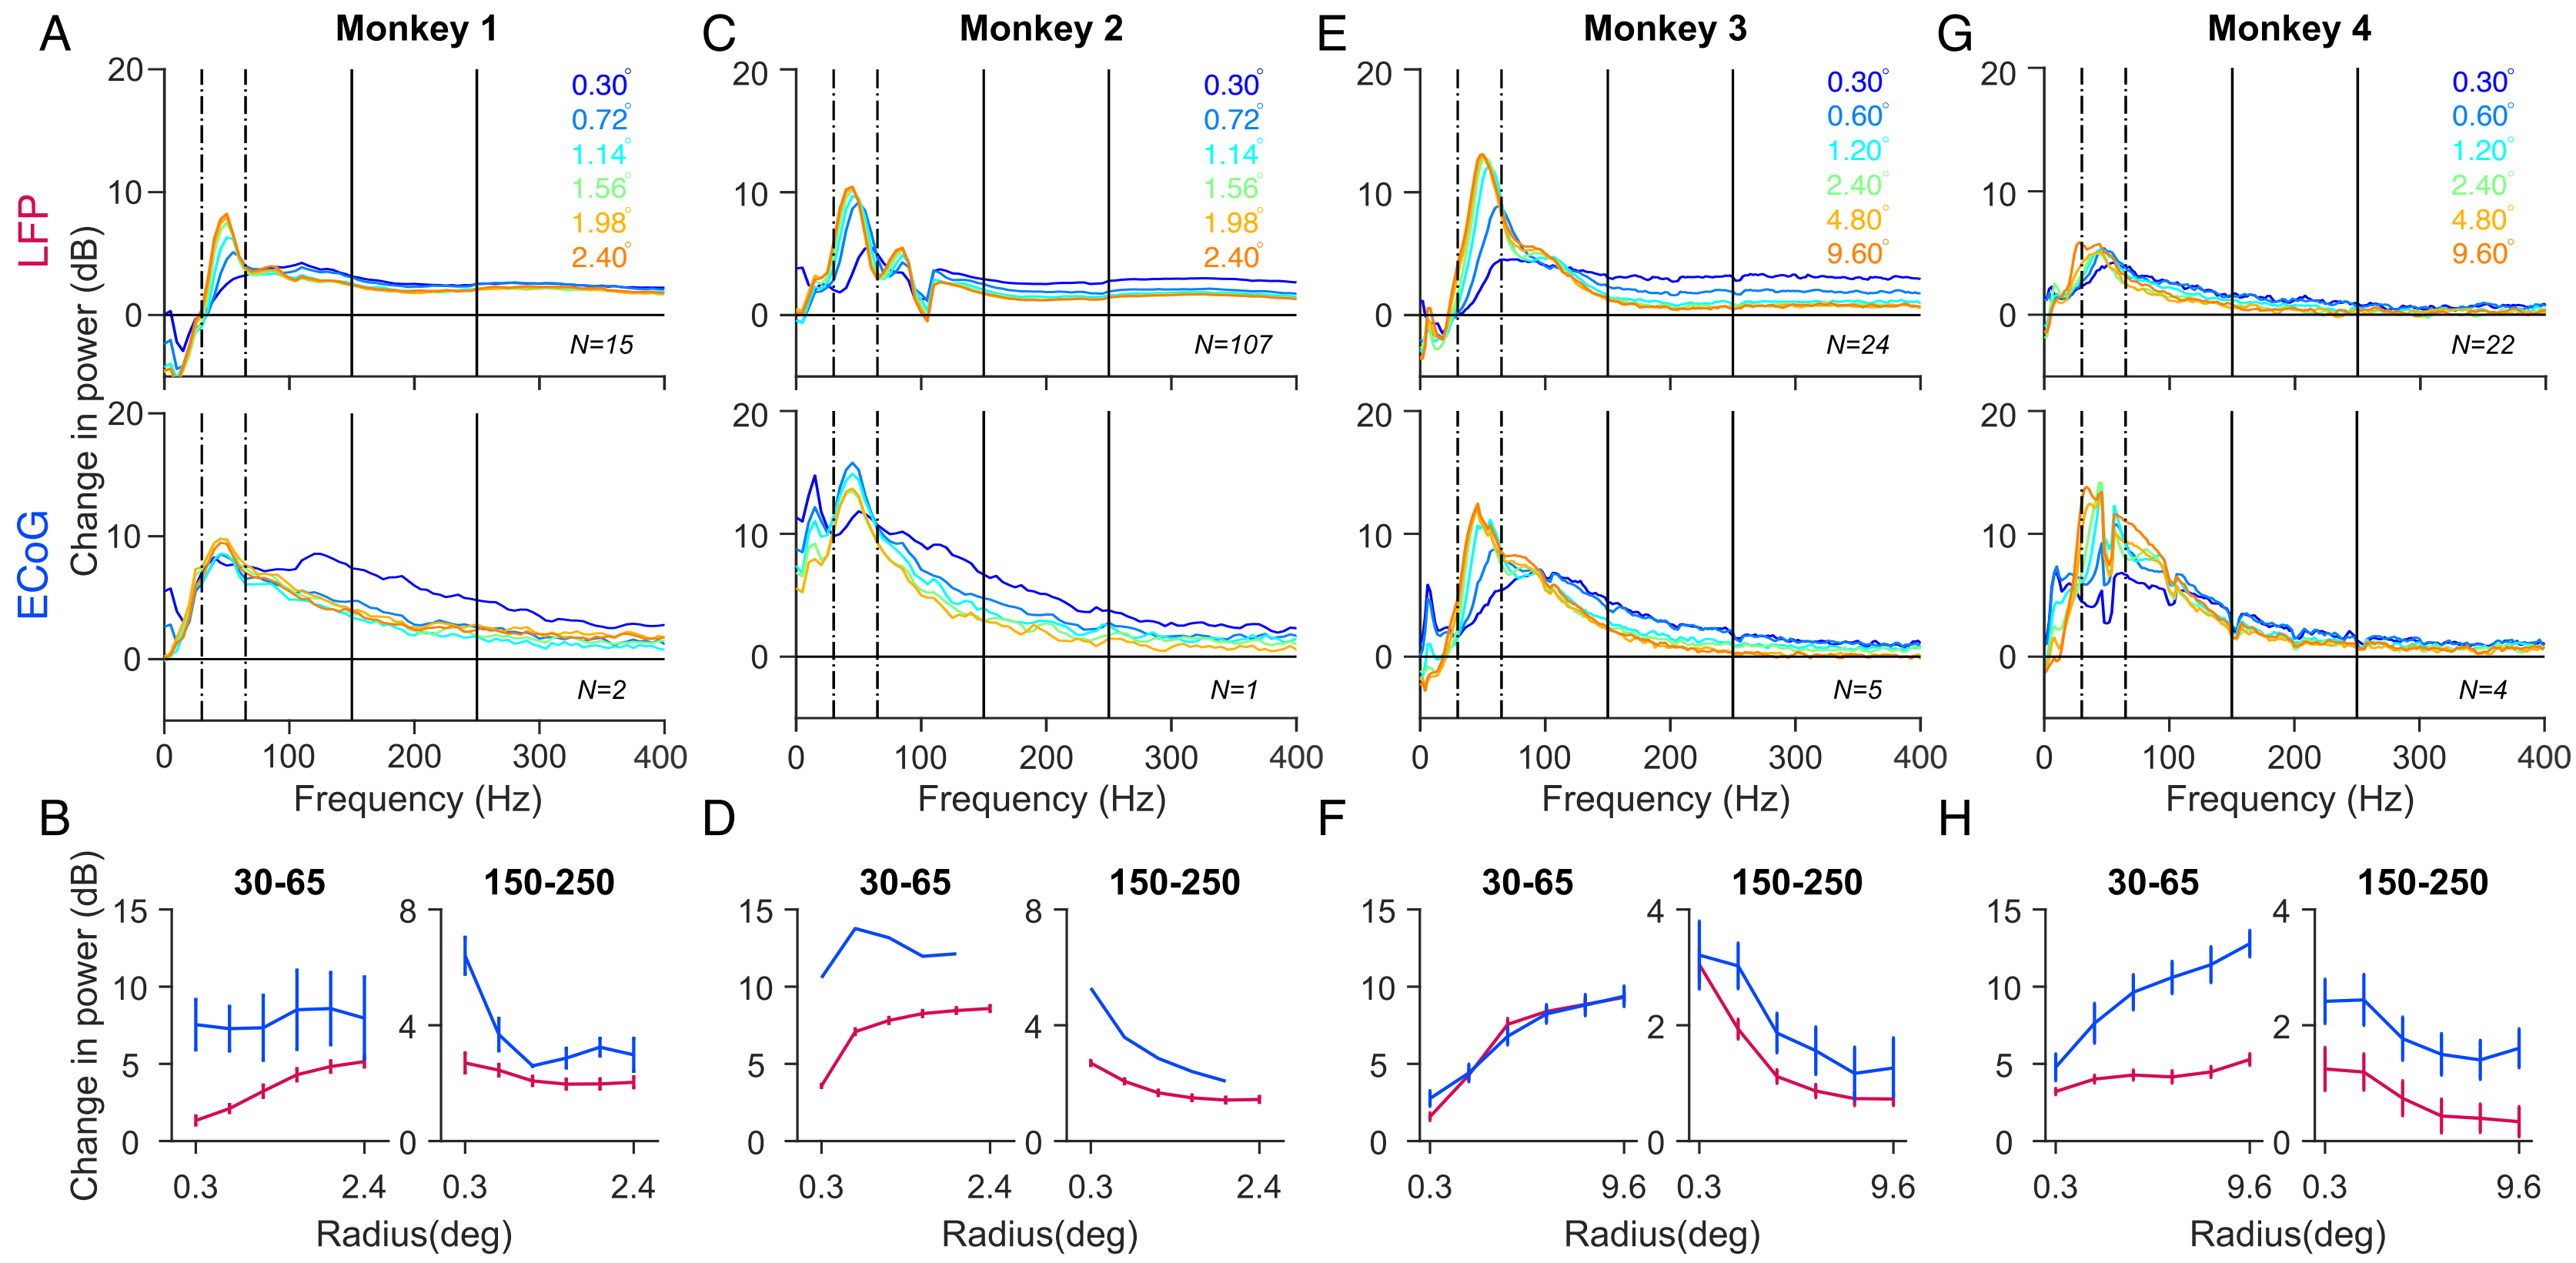

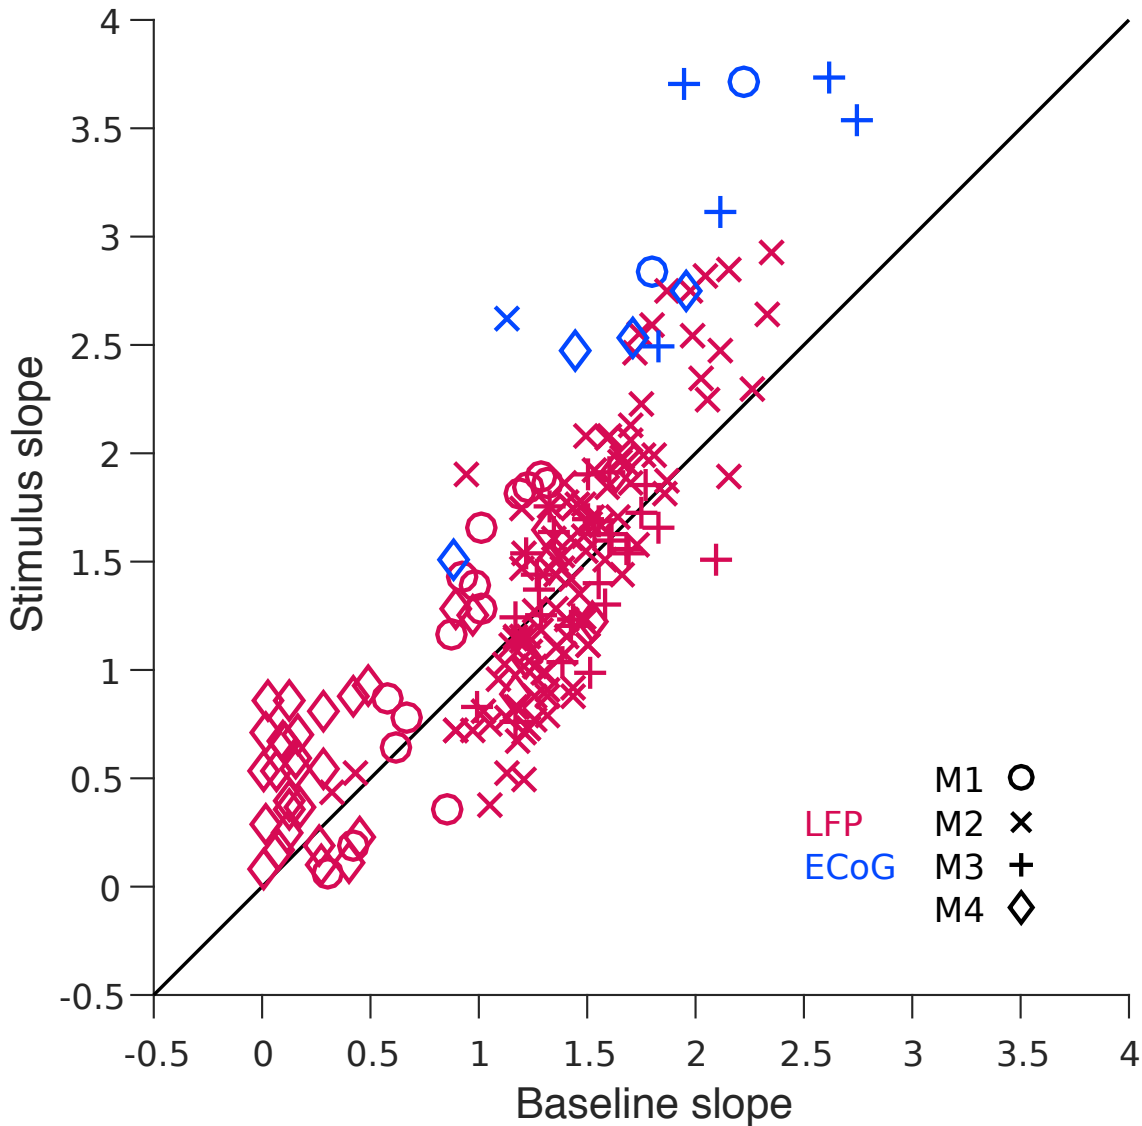

**Monkey 3**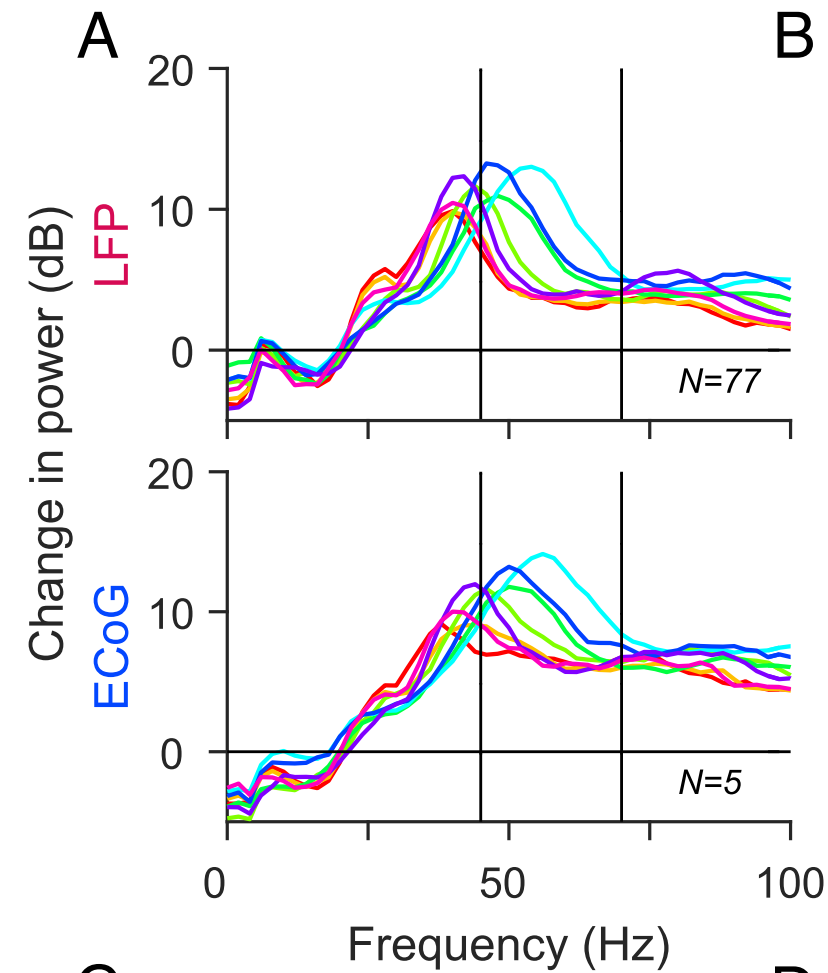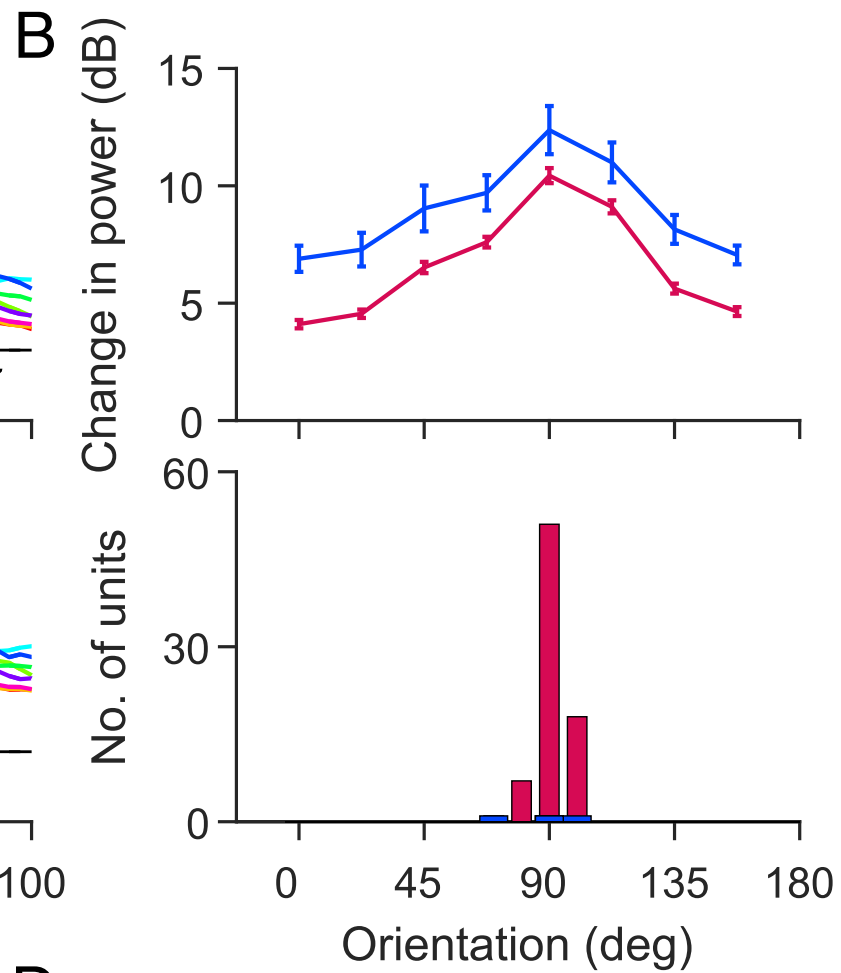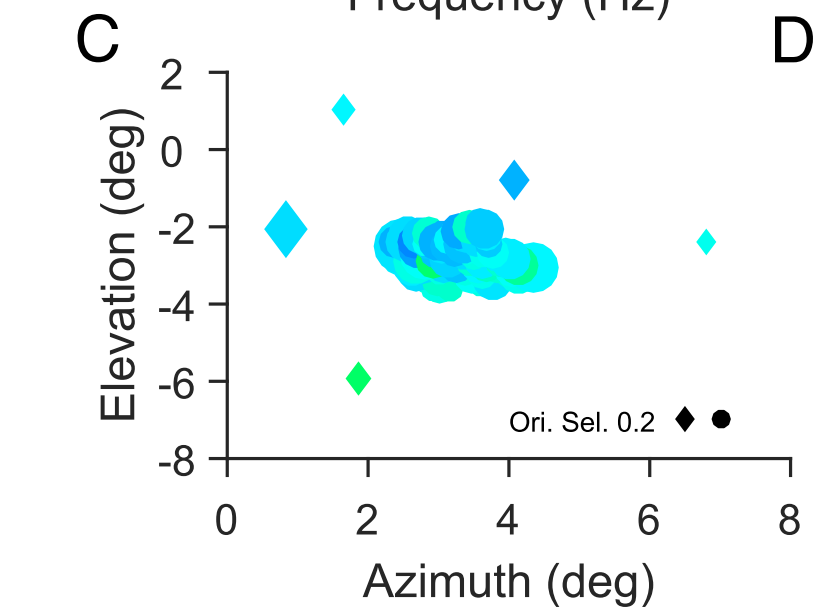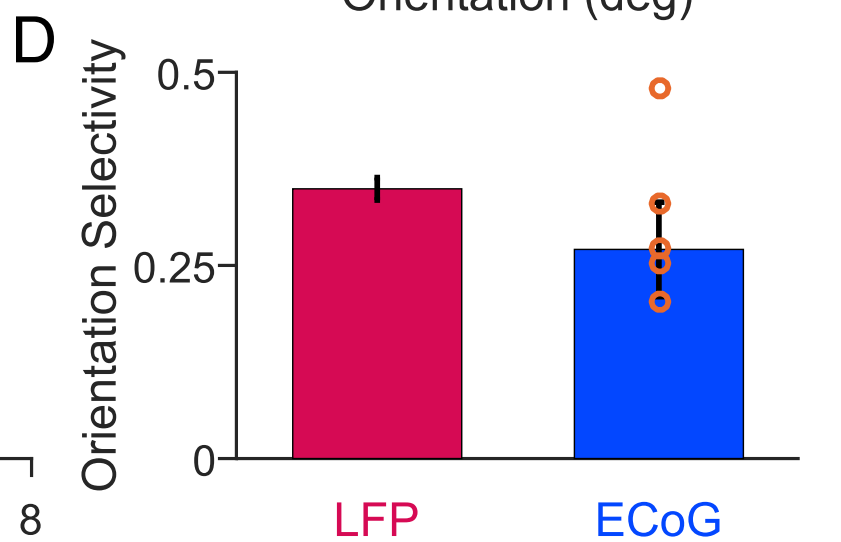**Monkey 4**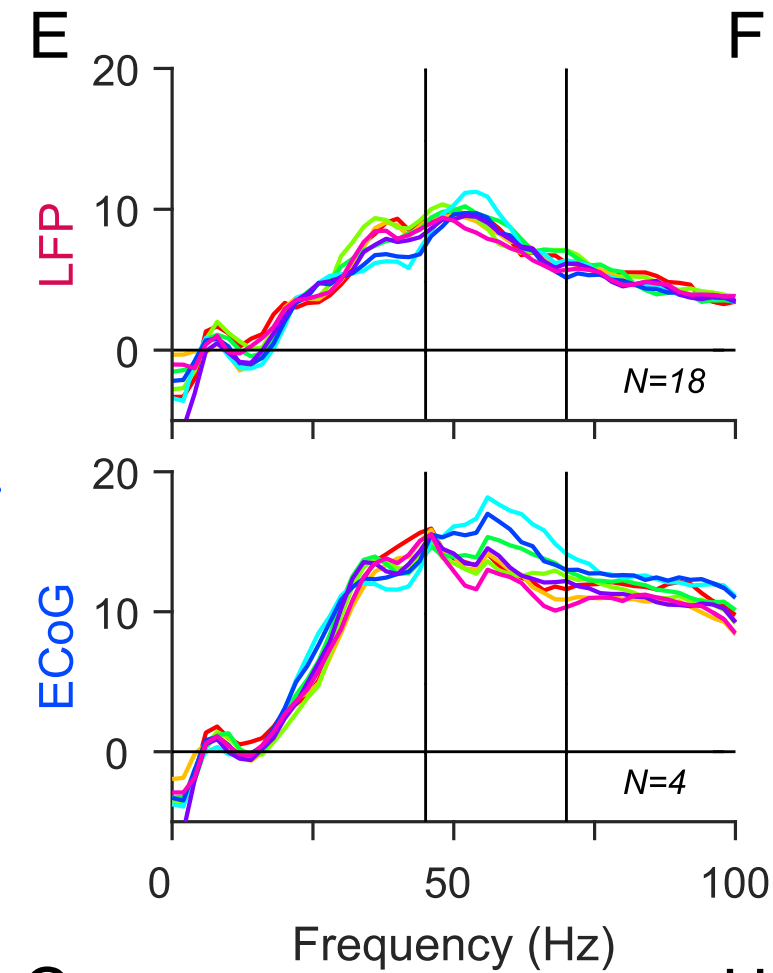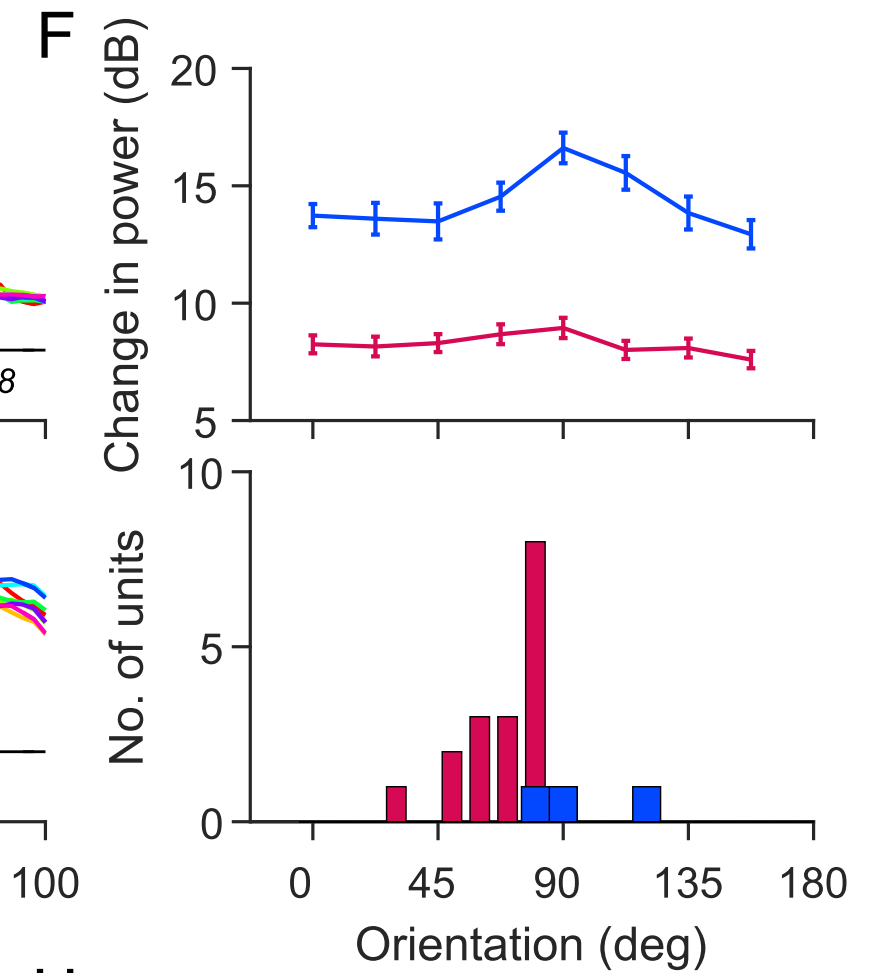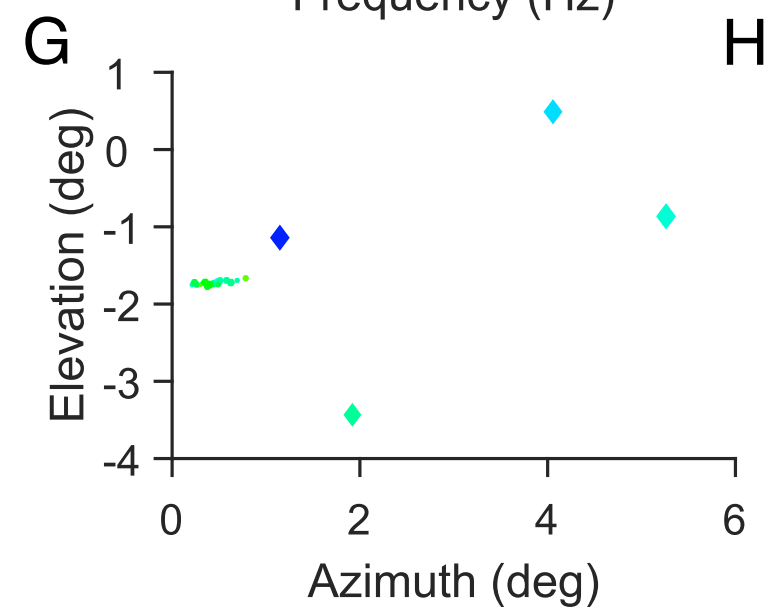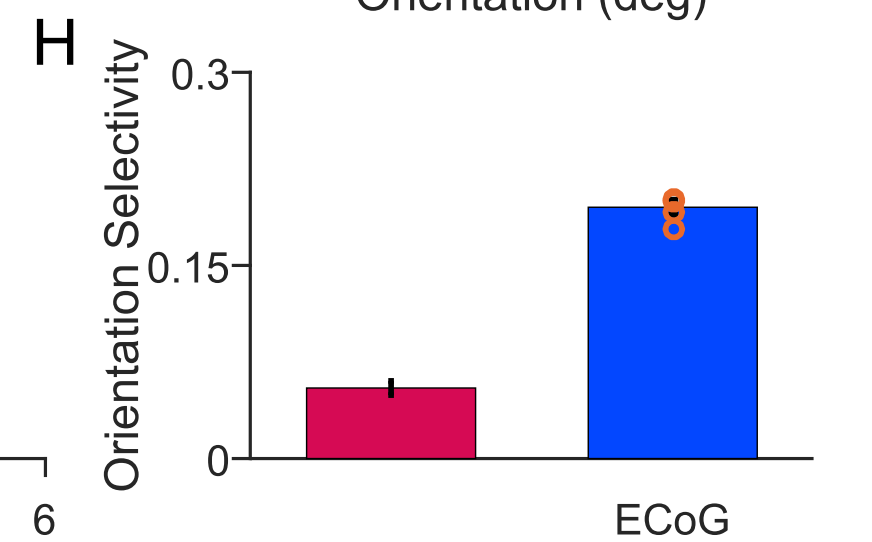



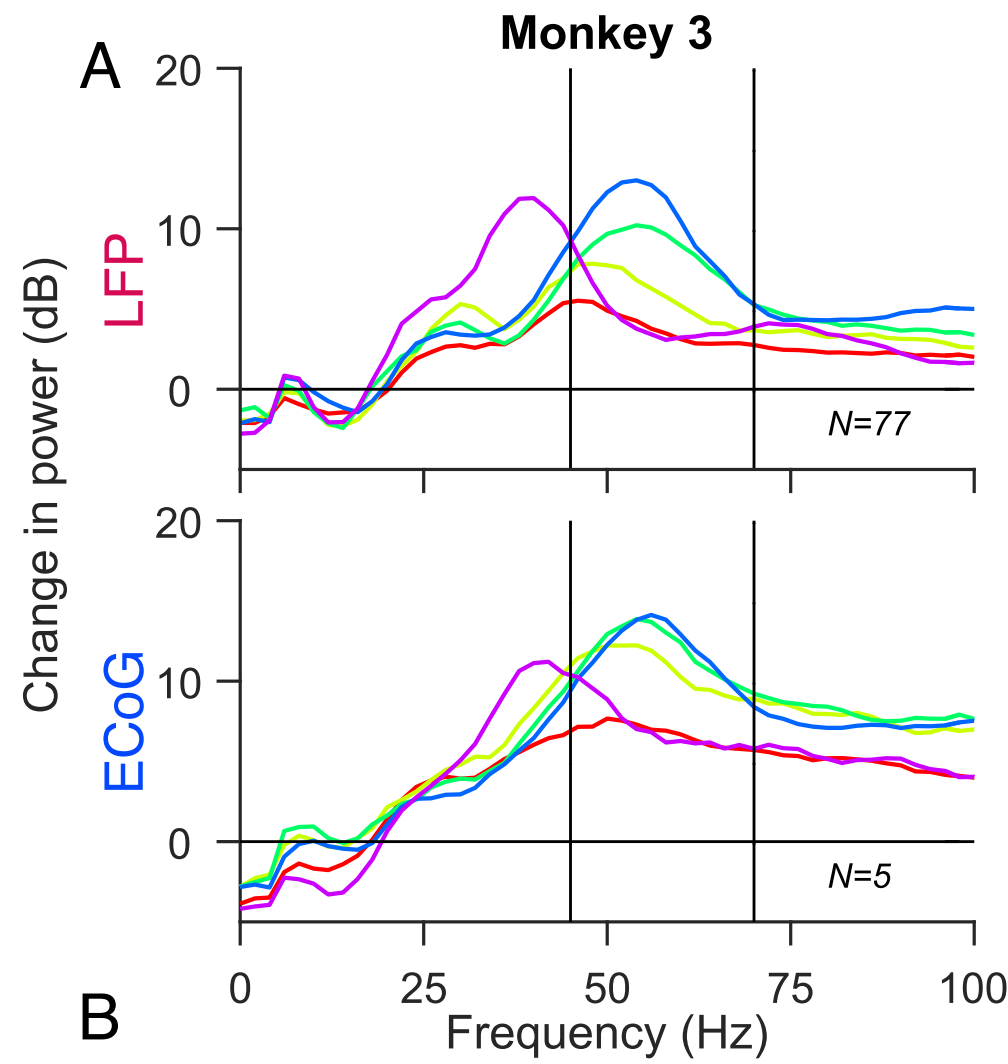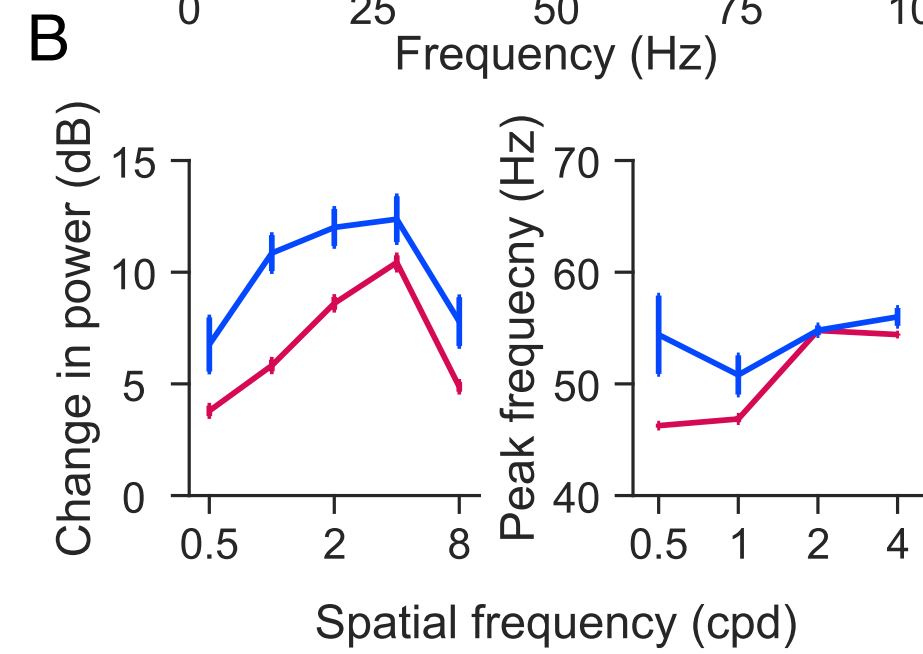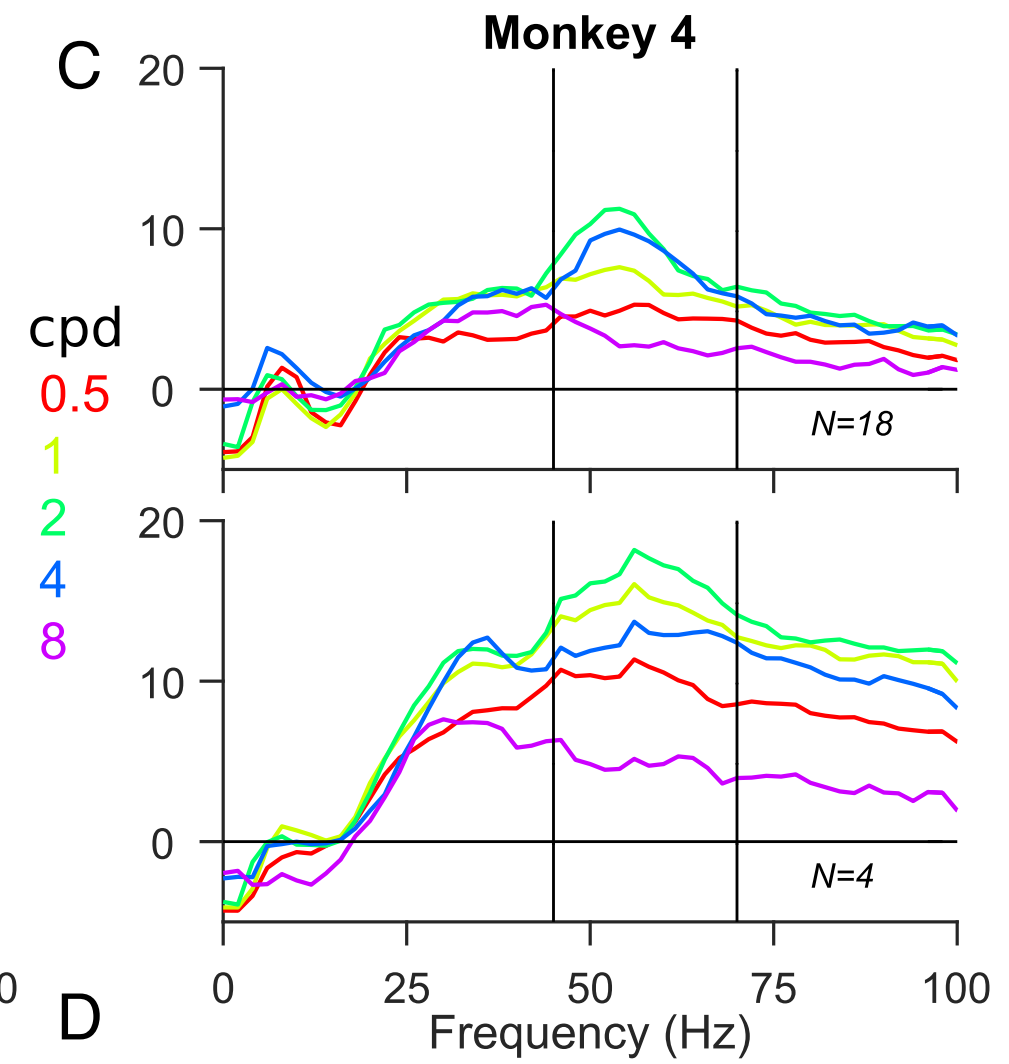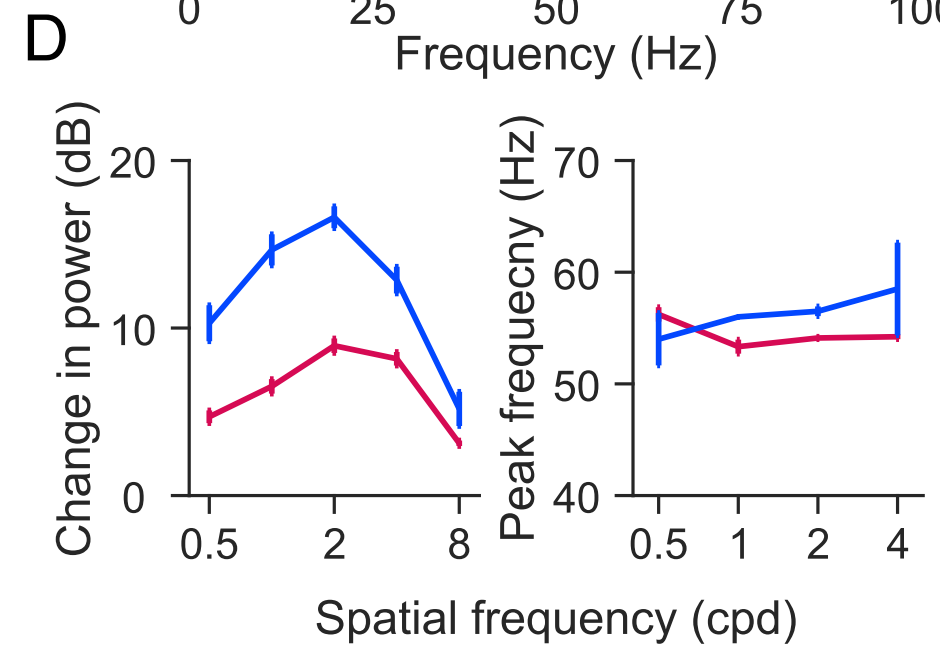

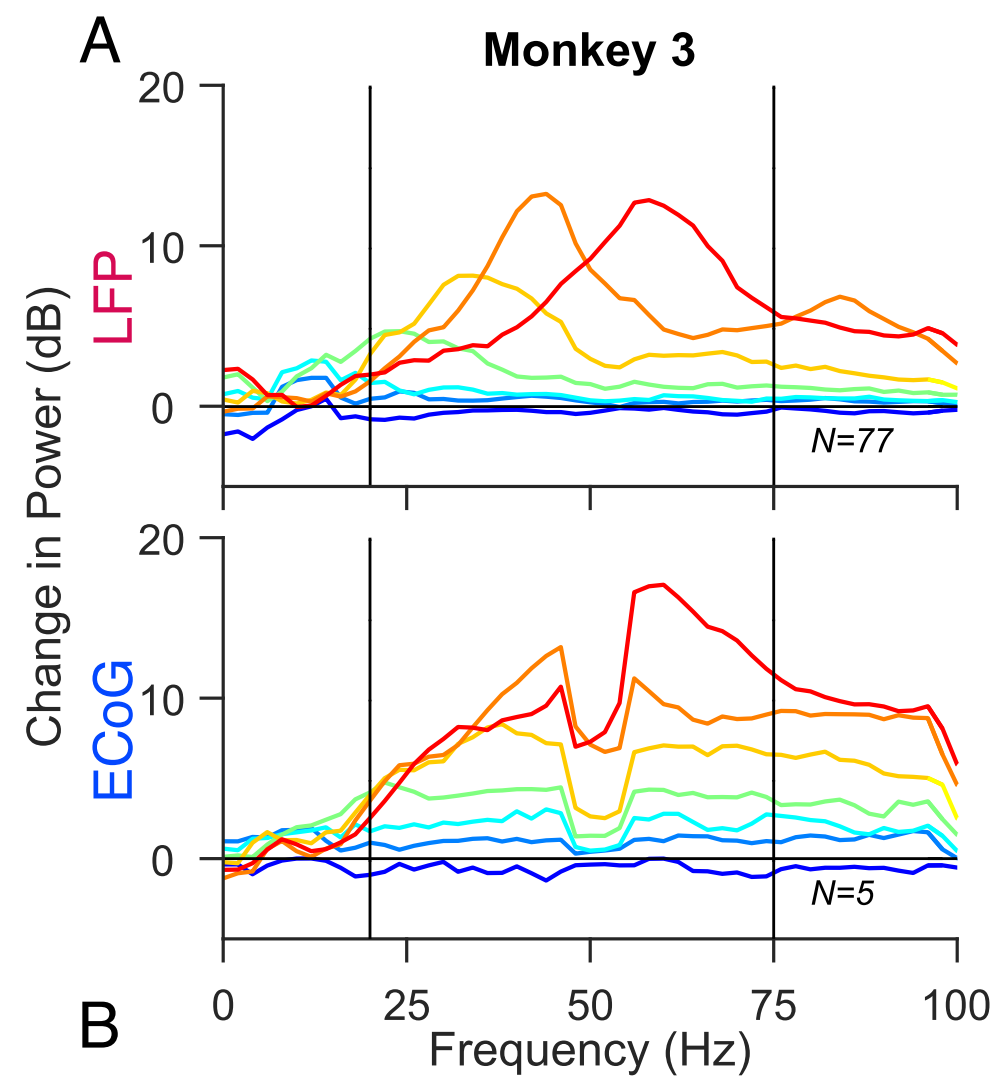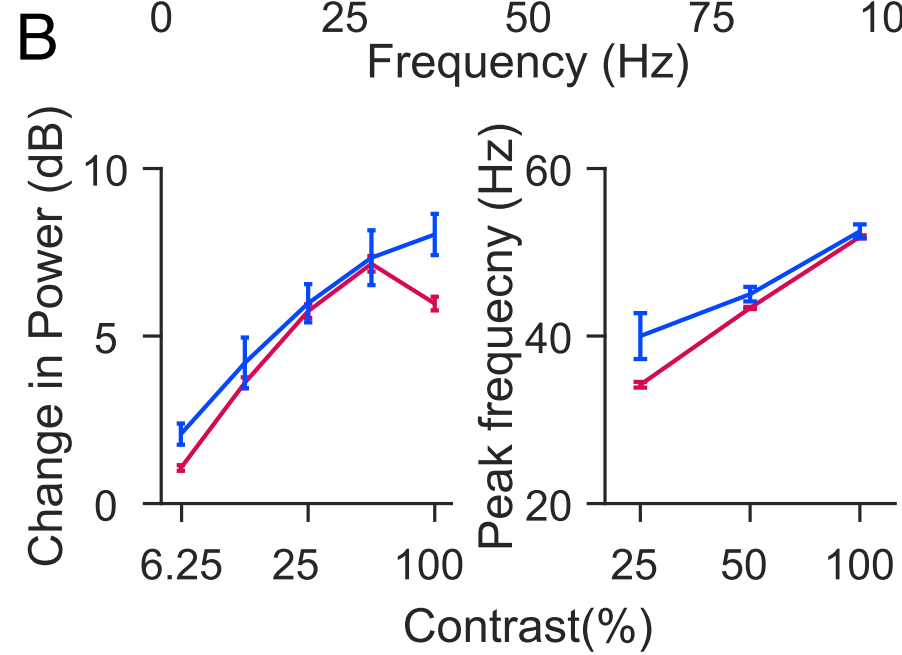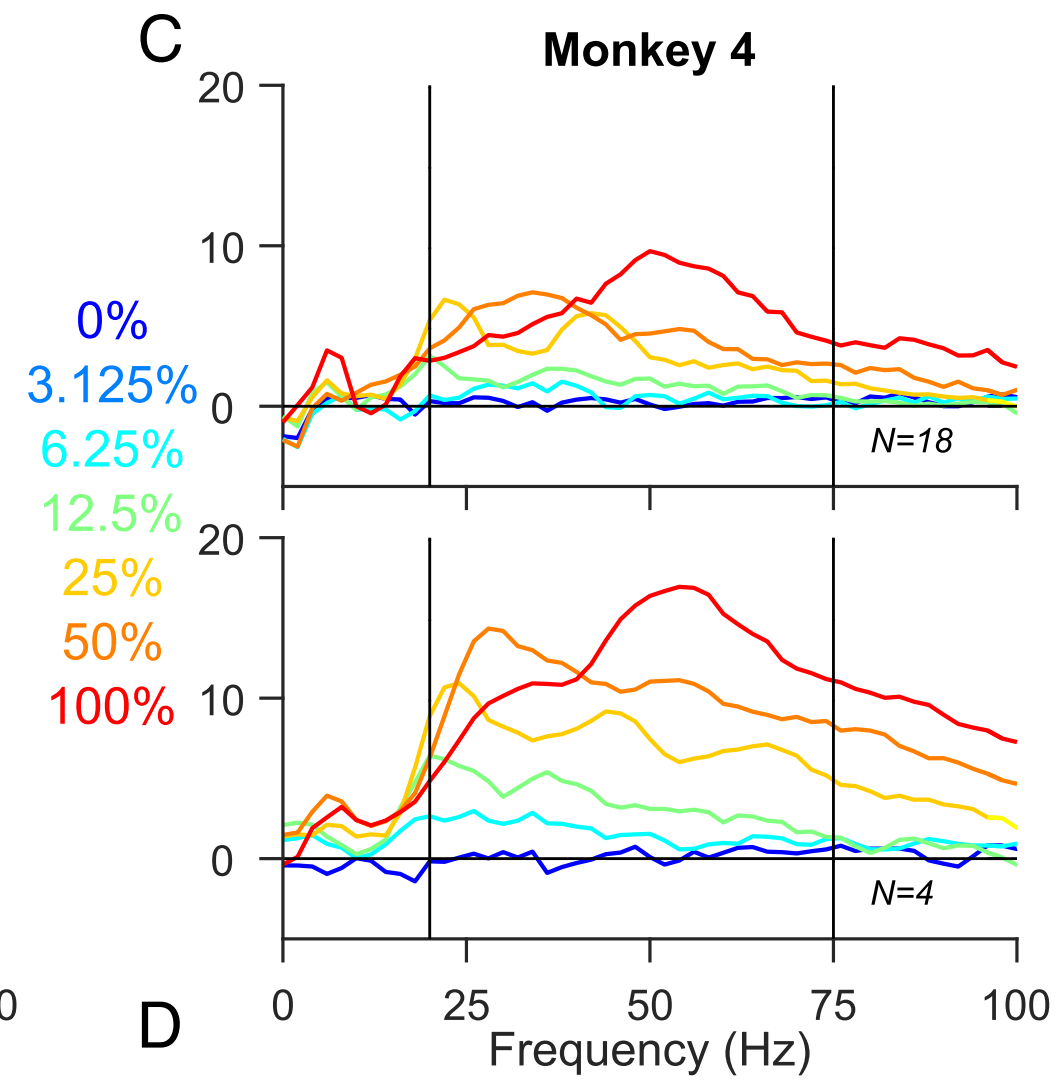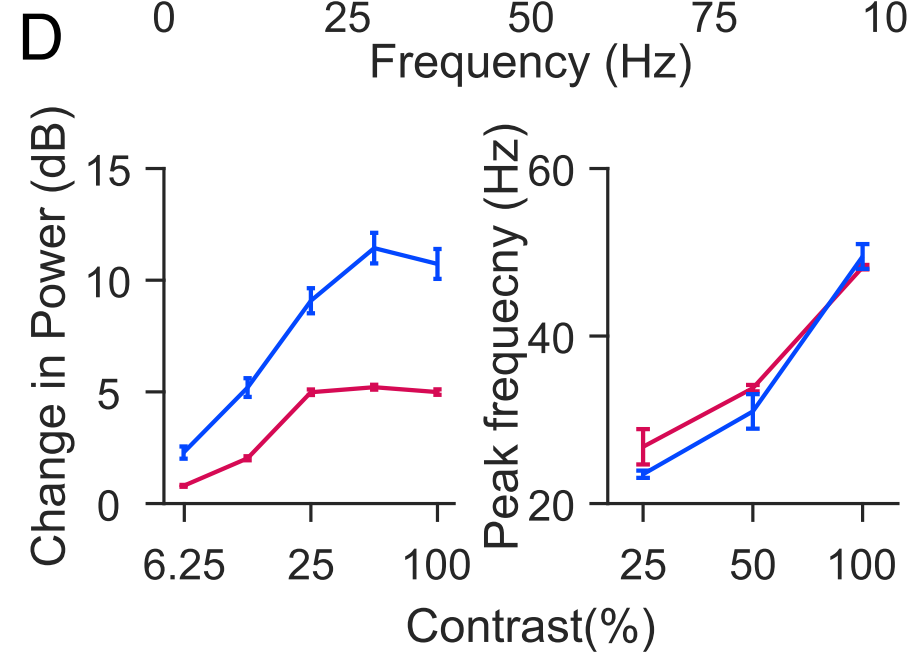

Source: http://biorxiv.org/content/10.1101/803429v1.full.pdf
